# Supplementary material
Source: HighWire-hosted journal article supplement (https://tobaccocontrol.bmj.com/content/tc-2022-057822)
Supplement: inline-supplementary-material-1 [file inline-supplementary-material-1.pdf]

Supplementary material for *Patterns of poly tobacco use in the Population Assessment of Tobacco and Health (PATH) study, 2013-2017: a multistate Markov transition analysis*

**Supplemental Figure 1.** The reduced Q matrix used for multistate modeling. Zero cells mean that the one-step instantaneous transition is not allowed, and that it goes through a latent unobserved state. Cigs = cigarettes, E-Cigs = e-cigarettes, OC = other combustibles, SLT = smokeless tobacco, Polyuse + Cigs is any product combination of three or more products that includes cigarettes, Polyuse no Cigs is any product combination of two or more products that does not include cigarettes.

|               |                     | Transition State |        |      |        |                   |     |               |                |            |                  |                     |
|---------------|---------------------|------------------|--------|------|--------|-------------------|-----|---------------|----------------|------------|------------------|---------------------|
|               |                     | Never            | Former | Cigs | E-Cigs | Other Combustible | SLT | Cigs + E-Cigs | Cigs + Combust | Cigs + SLT | Poly use w/ Cigs | Poly use w/out Cigs |
| Initial State | Never               | 1                | 1      | 1    | 1      | 1                 | 1   | 0             | 0              | 0          | 0                | 0                   |
|               | Former              | 0                | 1      | 1    | 1      | 1                 | 1   | 0             | 0              | 0          | 0                | 0                   |
|               | Cigs                | 0                | 1      | 1    | 0      | 0                 | 0   | 1             | 1              | 1          | 0                | 0                   |
|               | E-Cigs              | 0                | 1      | 0    | 1      | 0                 | 0   | 1             | 0              | 0          | 0                | 1                   |
|               | Other Combustible   | 0                | 1      | 0    | 0      | 1                 | 0   | 0             | 1              | 0          | 0                | 1                   |
|               | SLT                 | 0                | 1      | 0    | 0      | 0                 | 1   | 0             | 0              | 1          | 0                | 1                   |
|               | Cigs + E-Cigs       | 0                | 1      | 1    | 1      | 0                 | 0   | 1             | 0              | 0          | 1                | 0                   |
|               | Cigs + Combust      | 0                | 1      | 1    | 0      | 1                 | 0   | 0             | 1              | 0          | 1                | 0                   |
|               | Cigs + SLT          | 0                | 1      | 1    | 0      | 0                 | 1   | 0             | 0              | 1          | 1                | 0                   |
|               | Poly use w/ Cigs    | 0                | 1      | 1    | 0      | 0                 | 0   | 1             | 1              | 1          | 1                | 1                   |
|               | Poly use w/out Cigs | 0                | 1      | 0    | 1      | 1                 | 1   | 0             | 0              | 0          | 1                | 1                   |

**Supplemental Table 1.** Confidence intervals for modeled cumulative 1-wave transition probabilities with no covariate adjustment. Cigs = cigarettes, E-Cigs = e-cigarettes, OC = other combustibles, SLT = smokeless tobacco, Polyuse + Cigs is any product combination of three or more products that includes cigarettes, Polyuse no Cigs is any product combination of two or more products that does not include cigarettes.

|                     |                  | Transition State |                  |                  |                  |
|---------------------|------------------|------------------|------------------|------------------|------------------|
|                     |                  | Never            | Non-Current      | Cigs             | E-Cigs           |
| Initial State       | Never            | 95.5 (95.1,95.9) | 3.2 (2.9,3.6)    | 0.5 (0.4,0.5)    | 0.1 (0.1,0.2)    |
|                     | Non-Current      | 0 (0,0)          | 92.8 (92.4,93.2) | 2.7 (2.4,2.9)    | 0.8 (0.6,0.9)    |
|                     | Cigs             | 0 (0,0)          | 8.2 (7.6,8.8)    | 76.8 (75.9,77.7) | 0.7 (0.6,0.8)    |
|                     | E-Cigs           | 0 (0,0)          | 26.8 (24.0,29.6) | 7.1 (6.2,8.1)    | 45.7 (42.6,48.9) |
|                     | OC               | 0 (0,0)          | 37.9 (36.0,39.9) | 2.4 (2.1,2.7)    | 1.0 (0.8,1.2)    |
|                     | SLT              | 0 (0,0)          | 12.9 (10.7,15.1) | 1.0 (0.7,1.2)    | 0.5 (0.4,0.6)    |
|                     | Cigs + E-Cigs    | 0 (0,0)          | 5.9 (4.9,6.9)    | 46.2 (43.9,48.5) | 7.6 (6.6,8.6)    |
|                     | Cigs + OC        | 0 (0,0)          | 7.6 (6.2,9.0)    | 37.7 (35.4,39.9) | 0.4 (0.3,0.4)    |
|                     | Cigs + SLT       | 0 (0,0)          | 4.2 (2.4,6.0)    | 25.9 (22.3,29.4) | 0.4 (0.3,0.4)    |
|                     | Poly use w/ Cigs | 0 (0,0)          | 4.7 (3.7,5.7)    | 21.0 (19.3,22.7) | 1.9 (1.6,2.2)    |
| Poly use w/out Cigs | 0 (0,0)          | 19.2 (16.7,21.6) | 2.7 (2.3,3.1)    | 10.0 (8.2,11.8)  |                  |

|                     |                  | Transition State |                  |                  |                  |
|---------------------|------------------|------------------|------------------|------------------|------------------|
|                     |                  | SLT              | Cigs + E-Cigs    | Cigs + OC        | OC               |
| Initial State       | Never            | 0.06 (0.02,0.1)  | 0.03 (0.03,0.04) | 0.04 (0.03,0.04) | 0.5 (0.4,0.6)    |
|                     | Non-Current      | 0.5 (0.3,0.6)    | 0.2 (0.2,0.2)    | 0.2 (0.2,0.2)    | 2.6 (2.4,2.8)    |
|                     | Cigs             | 0.09 (0.06,0.1)  | 6.5 (6.1,6.9)    | 5.3 (4.8,5.7)    | 0.4 (0.3,0.4)    |
|                     | E-Cigs           | 0.7 (0.5,0.9)    | 10.7 (9.3,12.1)  | 0.5 (0.4,0.6)    | 1.7 (1.3,2.1)    |
|                     | OC               | 0.8 (0.6,0.9)    | 0.3 (0.3,0.4)    | 4.0 (3.4,4.7)    | 46.6 (44.5,48.7) |
|                     | SLT              | 77.2 (74.5,79.9) | 0.2 (0.1,0.2)    | 0.2 (0.1,0.2)    | 1.0 (0.8,1.2)    |
|                     | Cigs + E-Cigs    | 0.12 (0.09,0.14) | 29.7 (27.7,31.8) | 3.3 (3.0,3.6)    | 0.3 (0.3,0.3)    |
|                     | Cigs + OC        | 0.1 (0.1,0.2)    | 3.9 (3.5,4.3)    | 35.5 (33.4,37.6) | 3.7 (2.8,4.6)    |
|                     | Cigs + SLT       | 9.7 (6.6,12.8)   | 3.7 (3.1,4.2)    | 3.9 (3.3,4.6)    | 0.3 (0.2,0.3)    |
|                     | Poly use w/ Cigs | 1.0 (0.7,1.2)    | 13.1 (11.7,14.4) | 16.2 (14.6,17.8) | 1.4 (1.2,1.7)    |
| Poly use w/out Cigs | 8.6 (6.8,10.5)   | 2.9 (2.5,3.3)    | 2.7 (2.3,3.1)    | 16.4 (14.2,18.6) |                  |

|                     |                  | Transition State |                  |                     |
|---------------------|------------------|------------------|------------------|---------------------|
|                     |                  | Cigs + SLT       | Poly use w/ Cigs | Poly use w/out Cigs |
| Initial State       | Never            | 0 (0,0)          | 0.01 (0.01,0.01) | 0.03 (0.03,0.04)    |
|                     | Non-Current      | 0.02 (0.02,0.03) | 0.04 (0.04,0.05) | 0.2 (0.2,0.2)       |
|                     | Cigs             | 0.8 (0.6,0.9)    | 1.2 (1.1,1.3)    | 0.07 (0.06,0.09)    |
|                     | E-Cigs           | 0.1 (0.1,0.2)    | 1.5 (1.3,1.7)    | 5.2 (3.9,6.5)       |
|                     | OC               | 0.1 (0.1,0.1)    | 1.2 (1.0,1.4)    | 5.6 (4.9,6.3)       |
|                     | SLT              | 2.9 (1.9,3.9)    | 0.8 (0.6,1.0)    | 3.5 (2.6,4.3)       |
|                     | Cigs + E-Cigs    | 0.8 (0.6,0.9)    | 5.3 (4.5,6.2)    | 0.7 (0.6,0.9)       |
|                     | Cigs + OC        | 1.1 (0.9,1.3)    | 9.5 (8.5,10.5)   | 0.6 (0.5,0.7)       |
|                     | Cigs + SLT       | 39.3 (34.5,44.0) | 12.0 (9.7,14.3)  | 0.7 (0.6,0.9)       |
|                     | Poly use w/ Cigs | 6.0 (5.0,7.1)    | 32.3 (30.1,34.5) | 2.4 (1.6,3.1)       |
| Poly use w/out Cigs | 0.9 (0.7,1.1)    | 7.5 (6.3,8.8)    | 29.1 (26.0,32.1) |                     |

**Supplemental Figure 2.** Forest plots of HRs by selected sociodemographic groups for each allowed transition (from univariable models). Red HRs are significantly different from 1, and black HRs are not significantly different from 1 at a 0.05 significance level. NH: Non-Hispanic, HS: high school, OC: other combustibles, SLT: smokeless tobacco. Cigs = cigarettes, E-Cigs = e-cigarettes, OC = other combustibles, SLT = smokeless tobacco, Polyuse + Cigs is any product combination of three or more products that includes cigarettes, Polyuse no Cigs is any product combination of two or more products that does not include cigarettes.

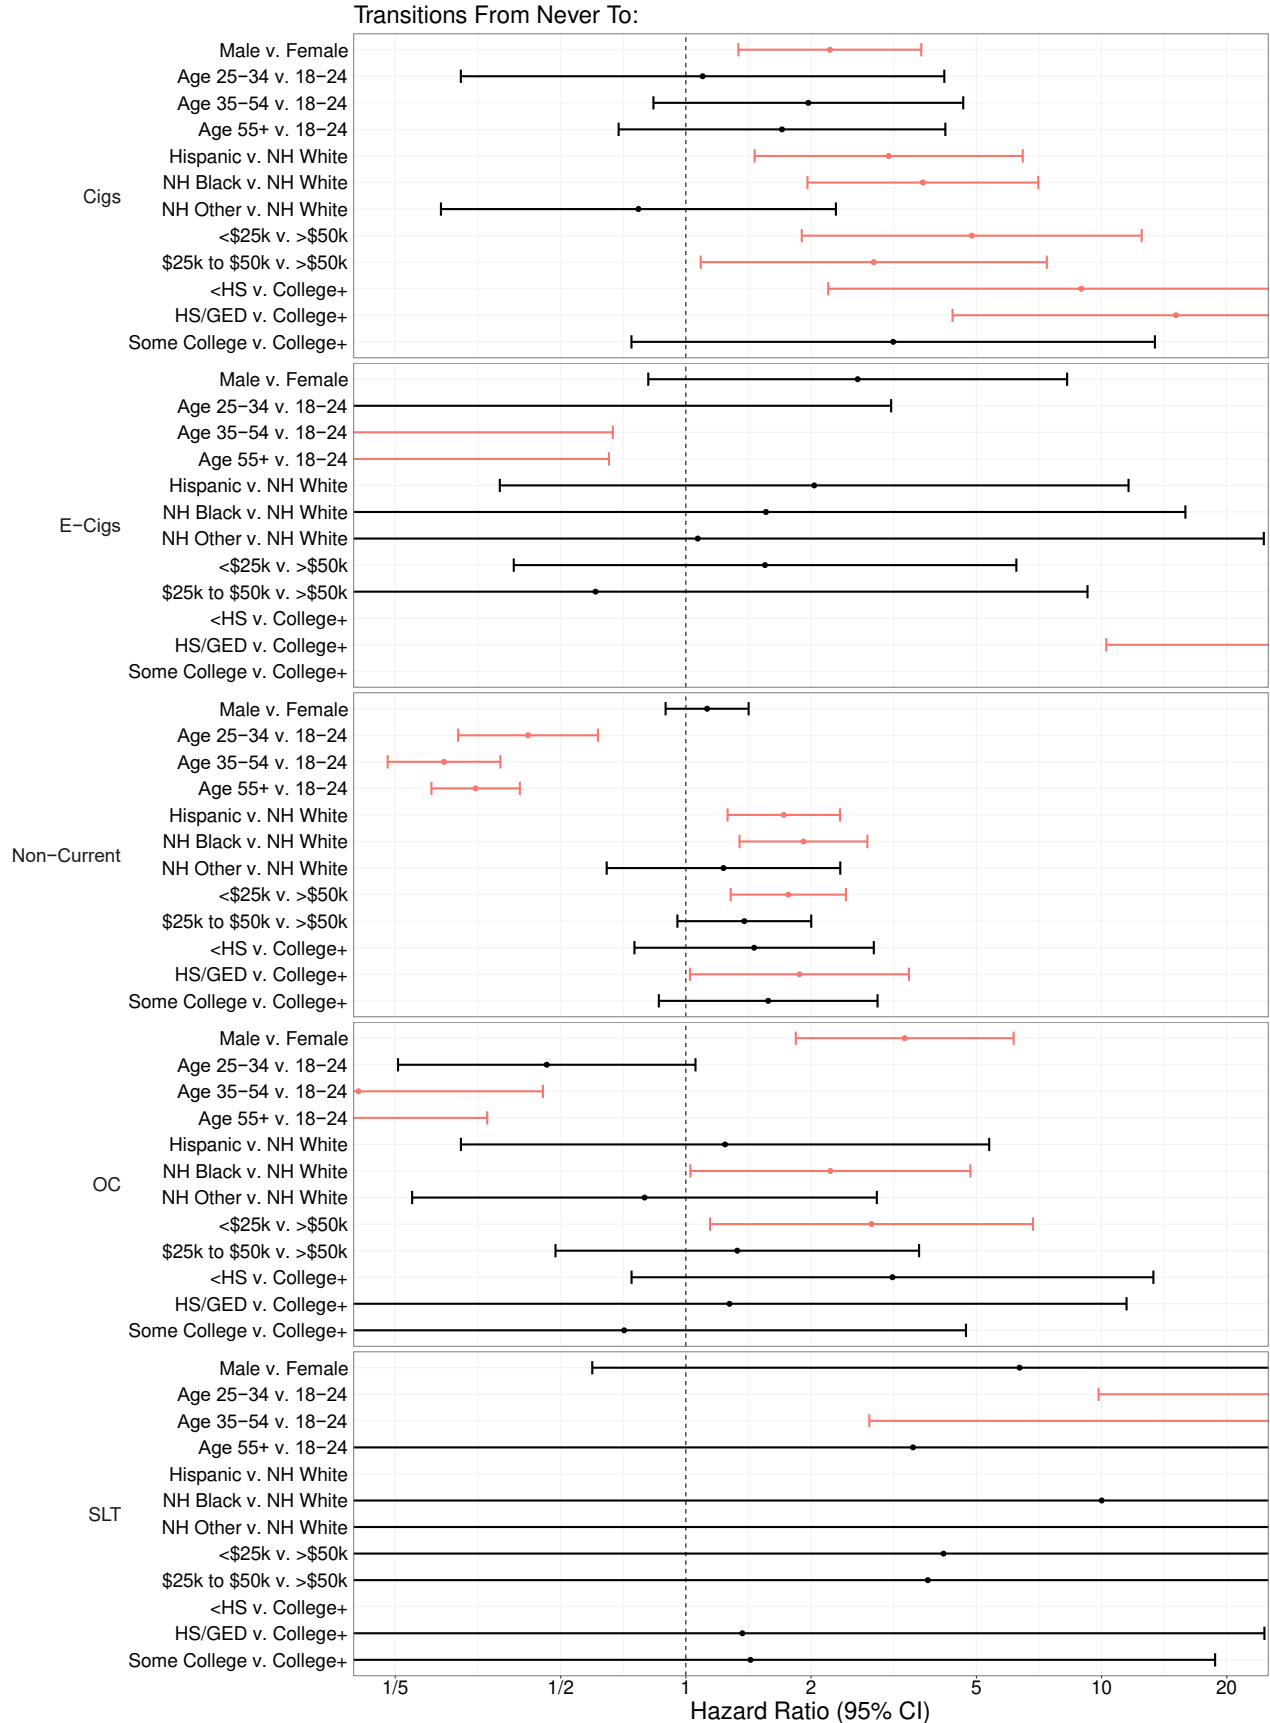

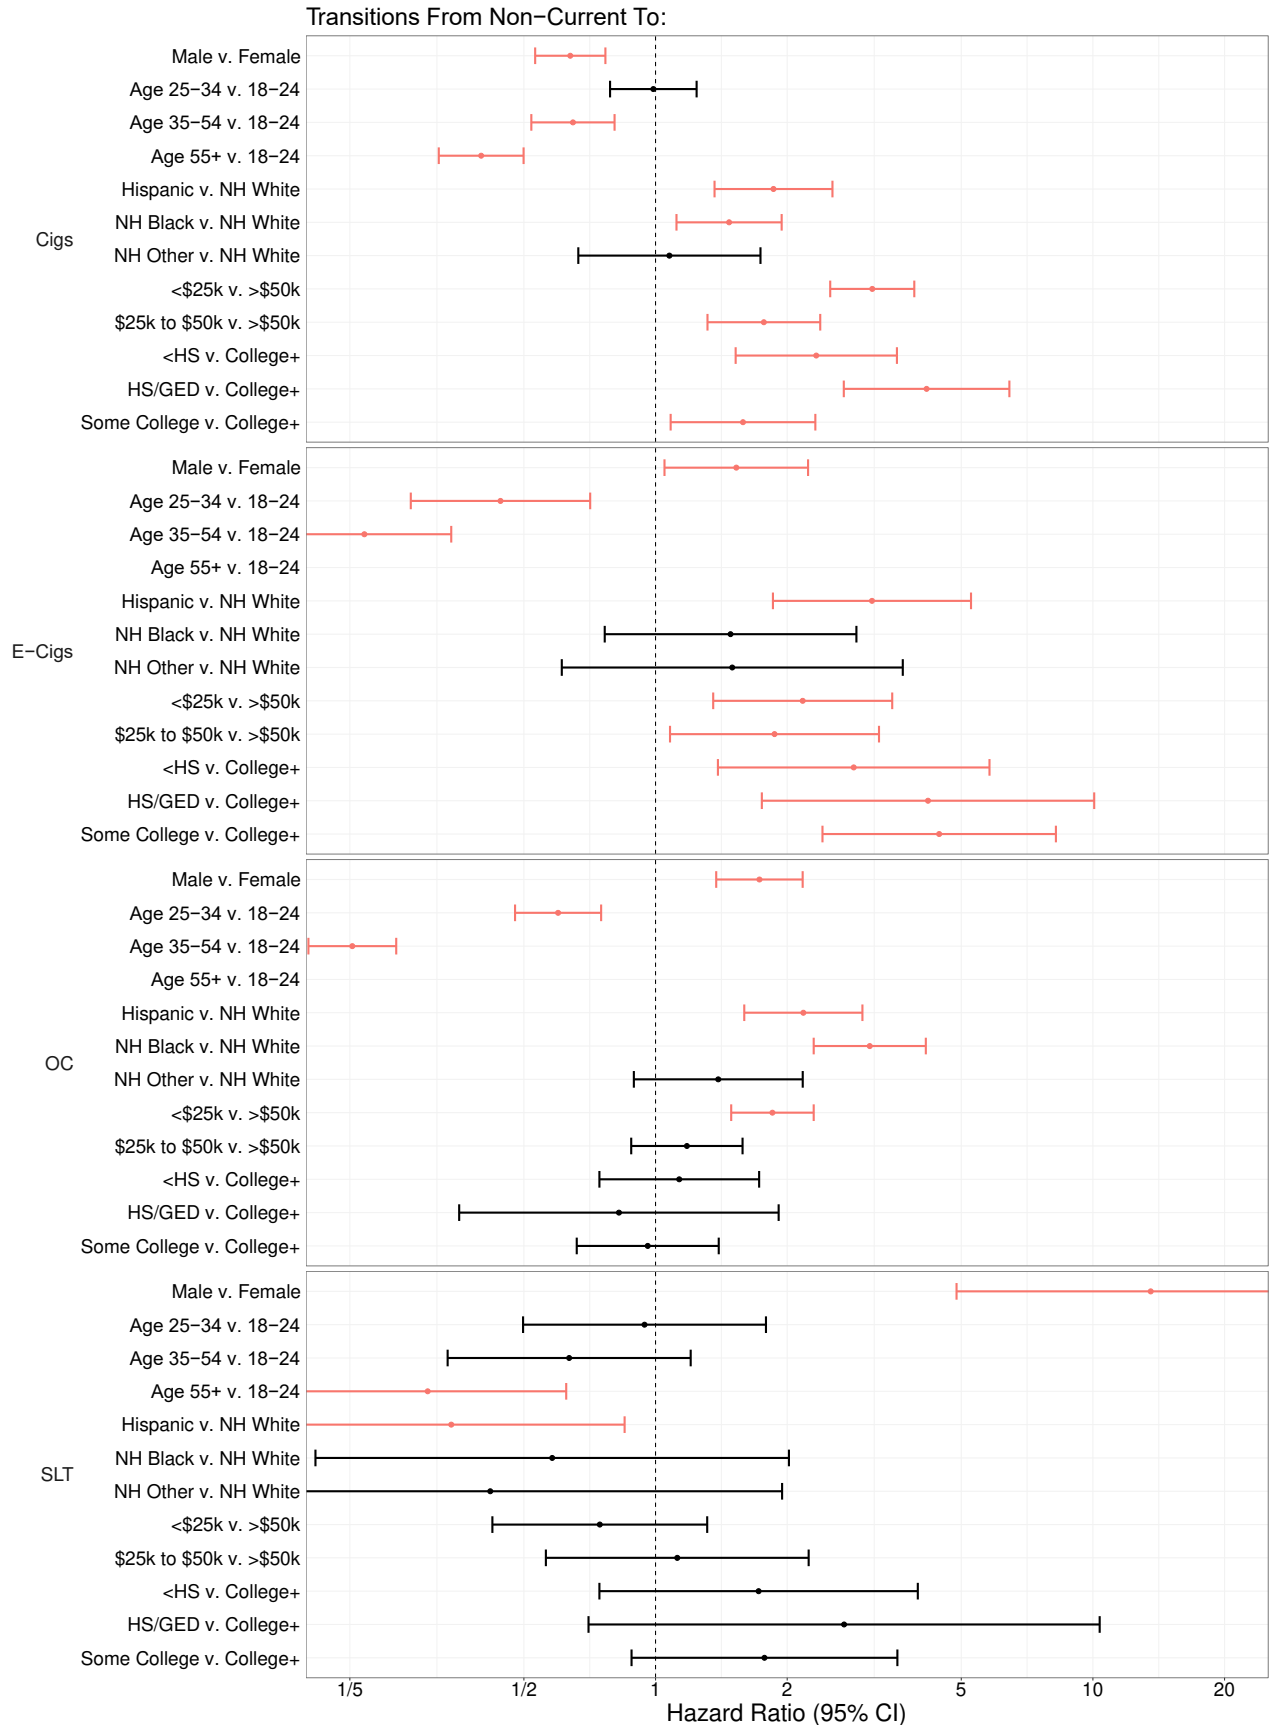

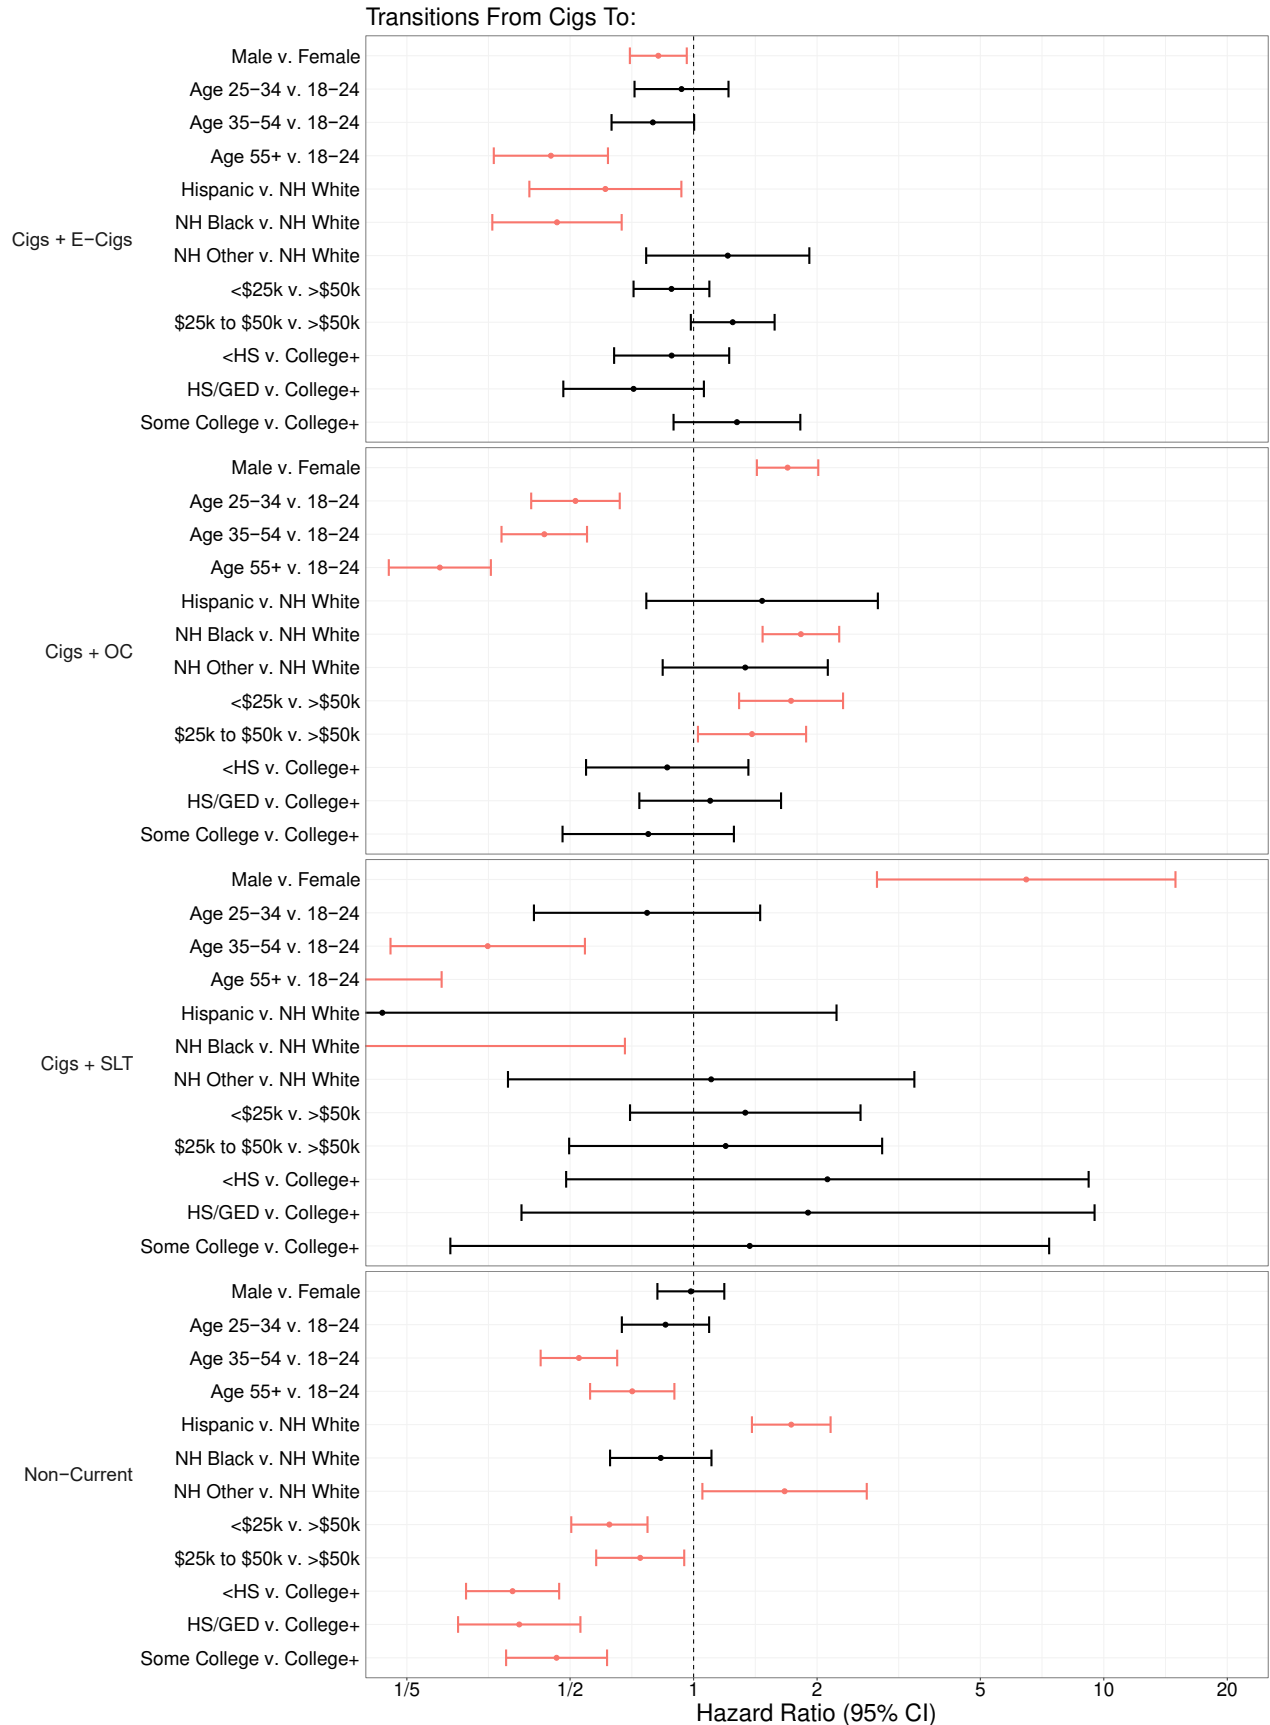

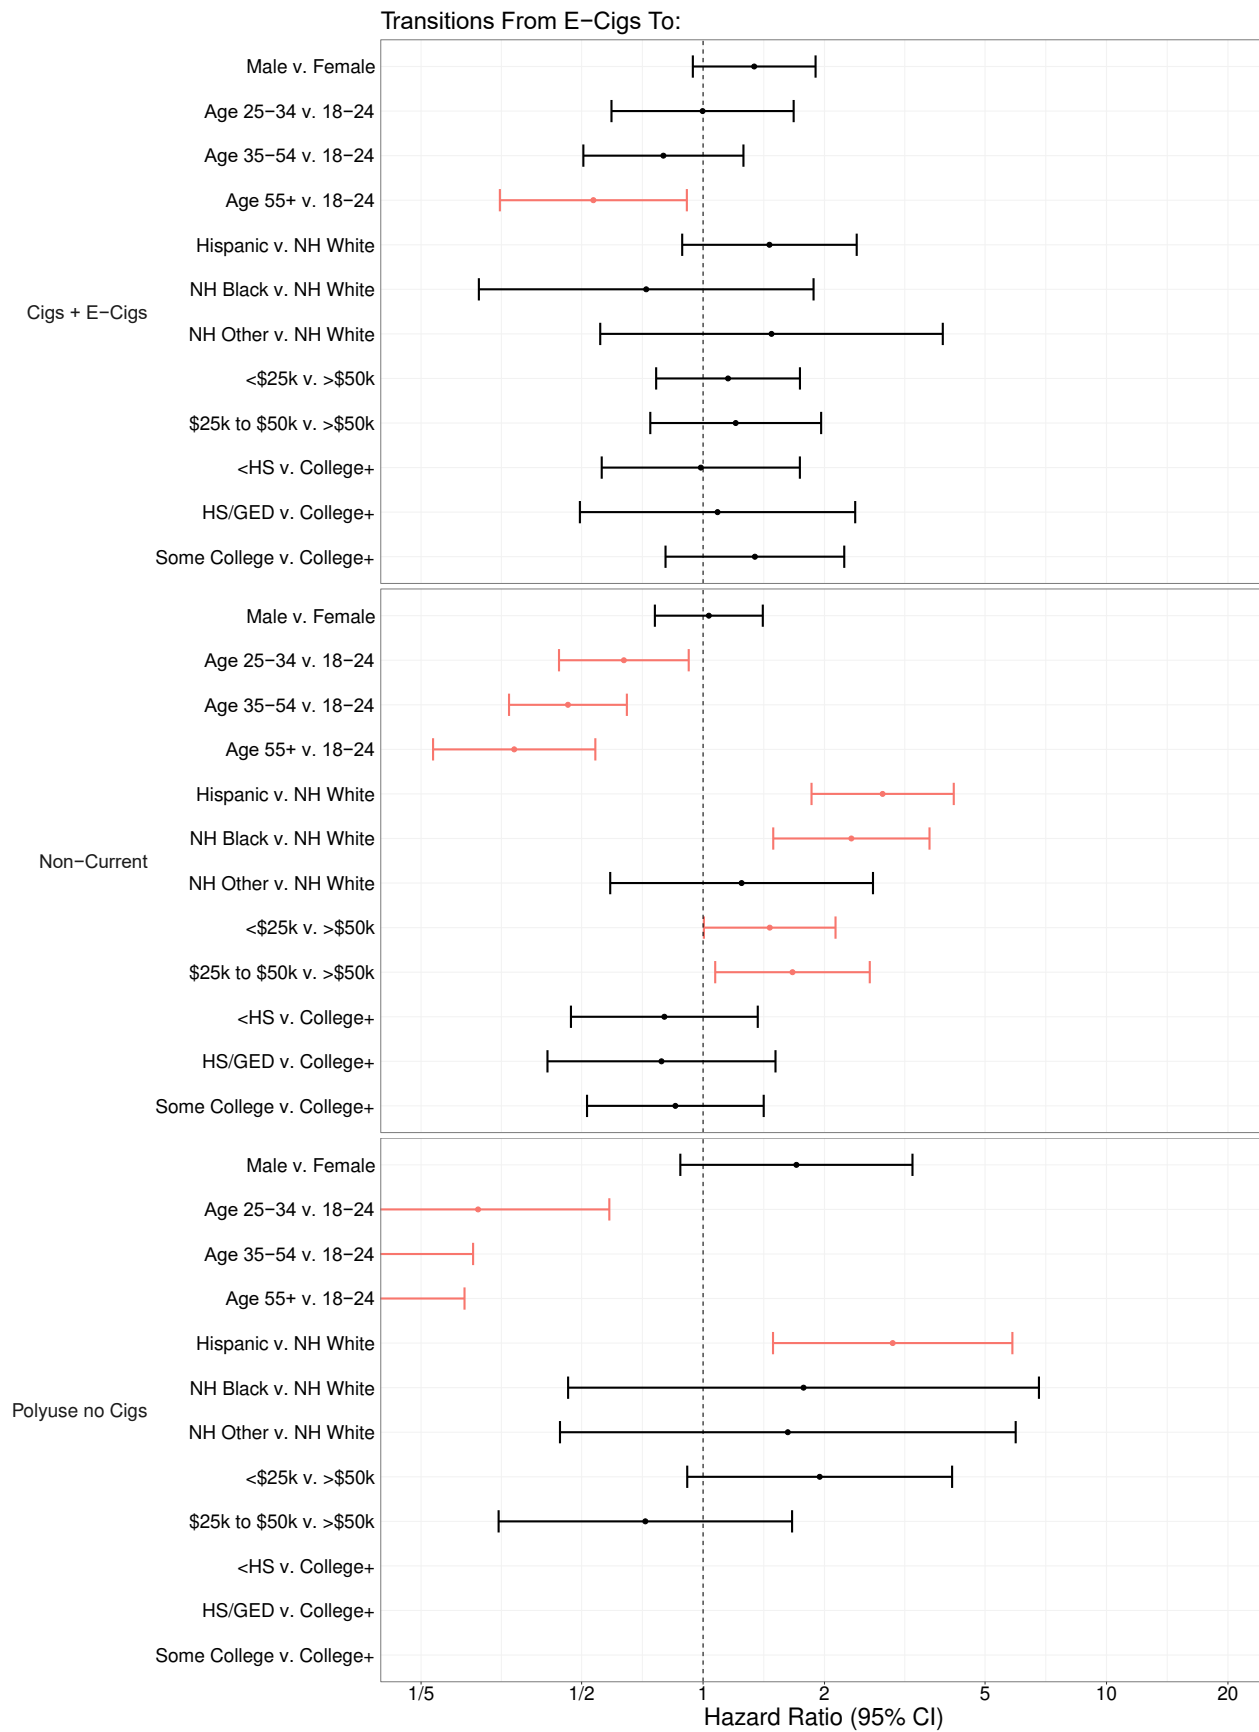

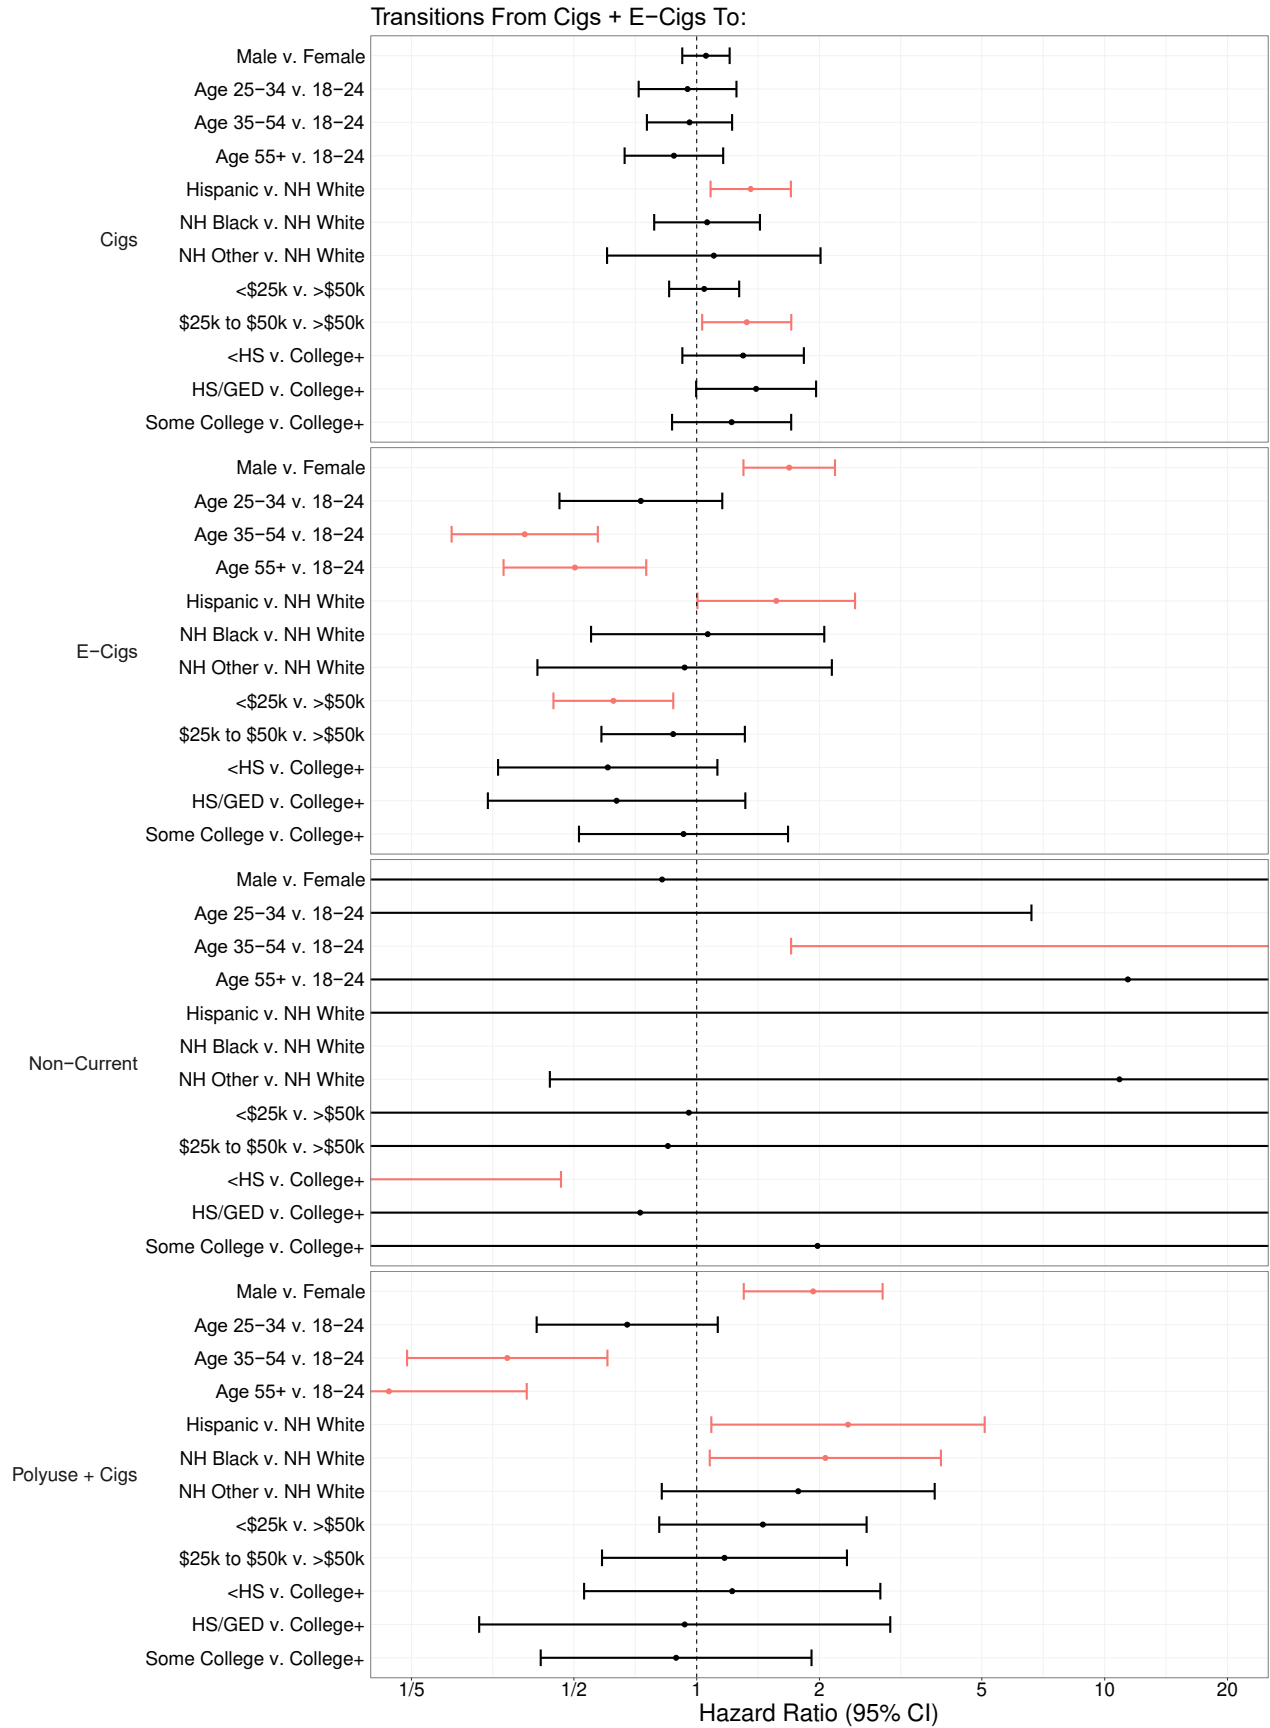



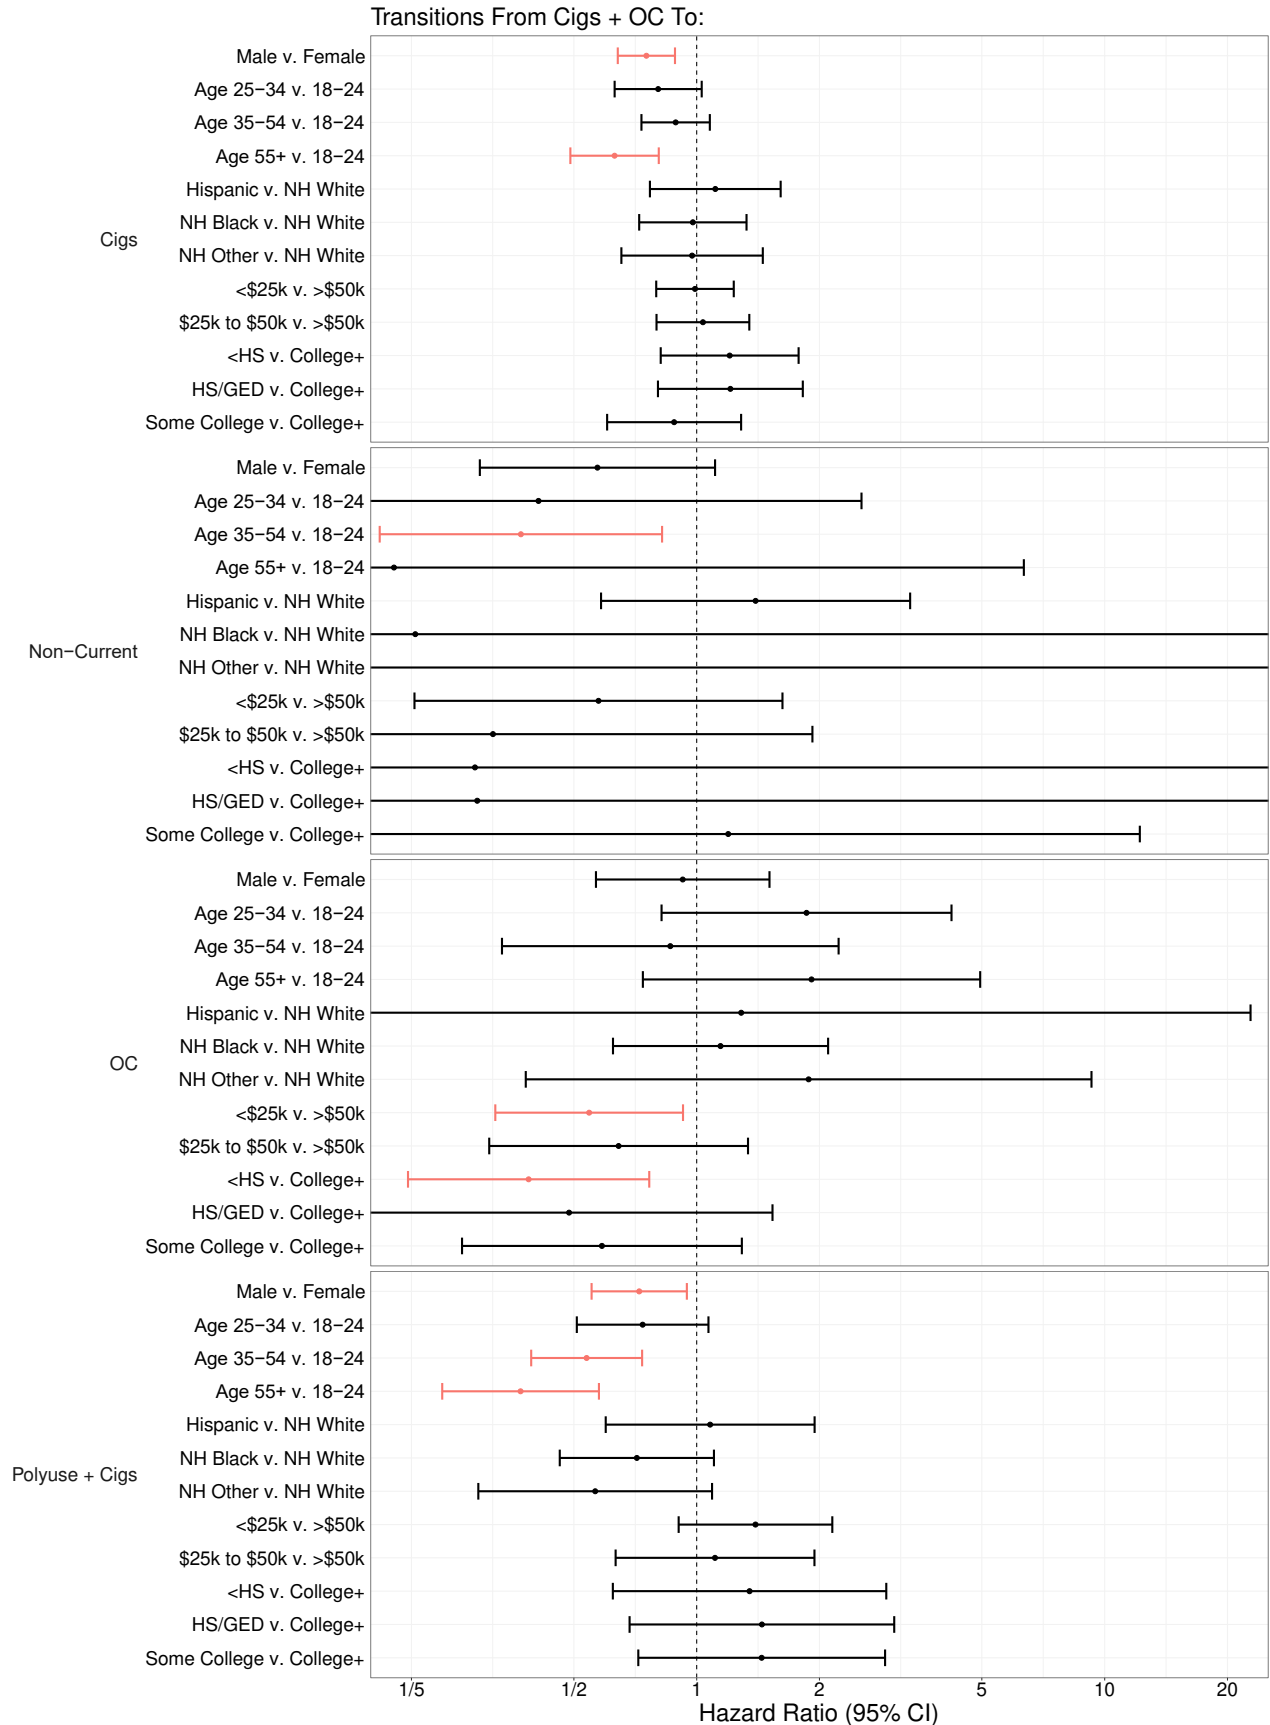

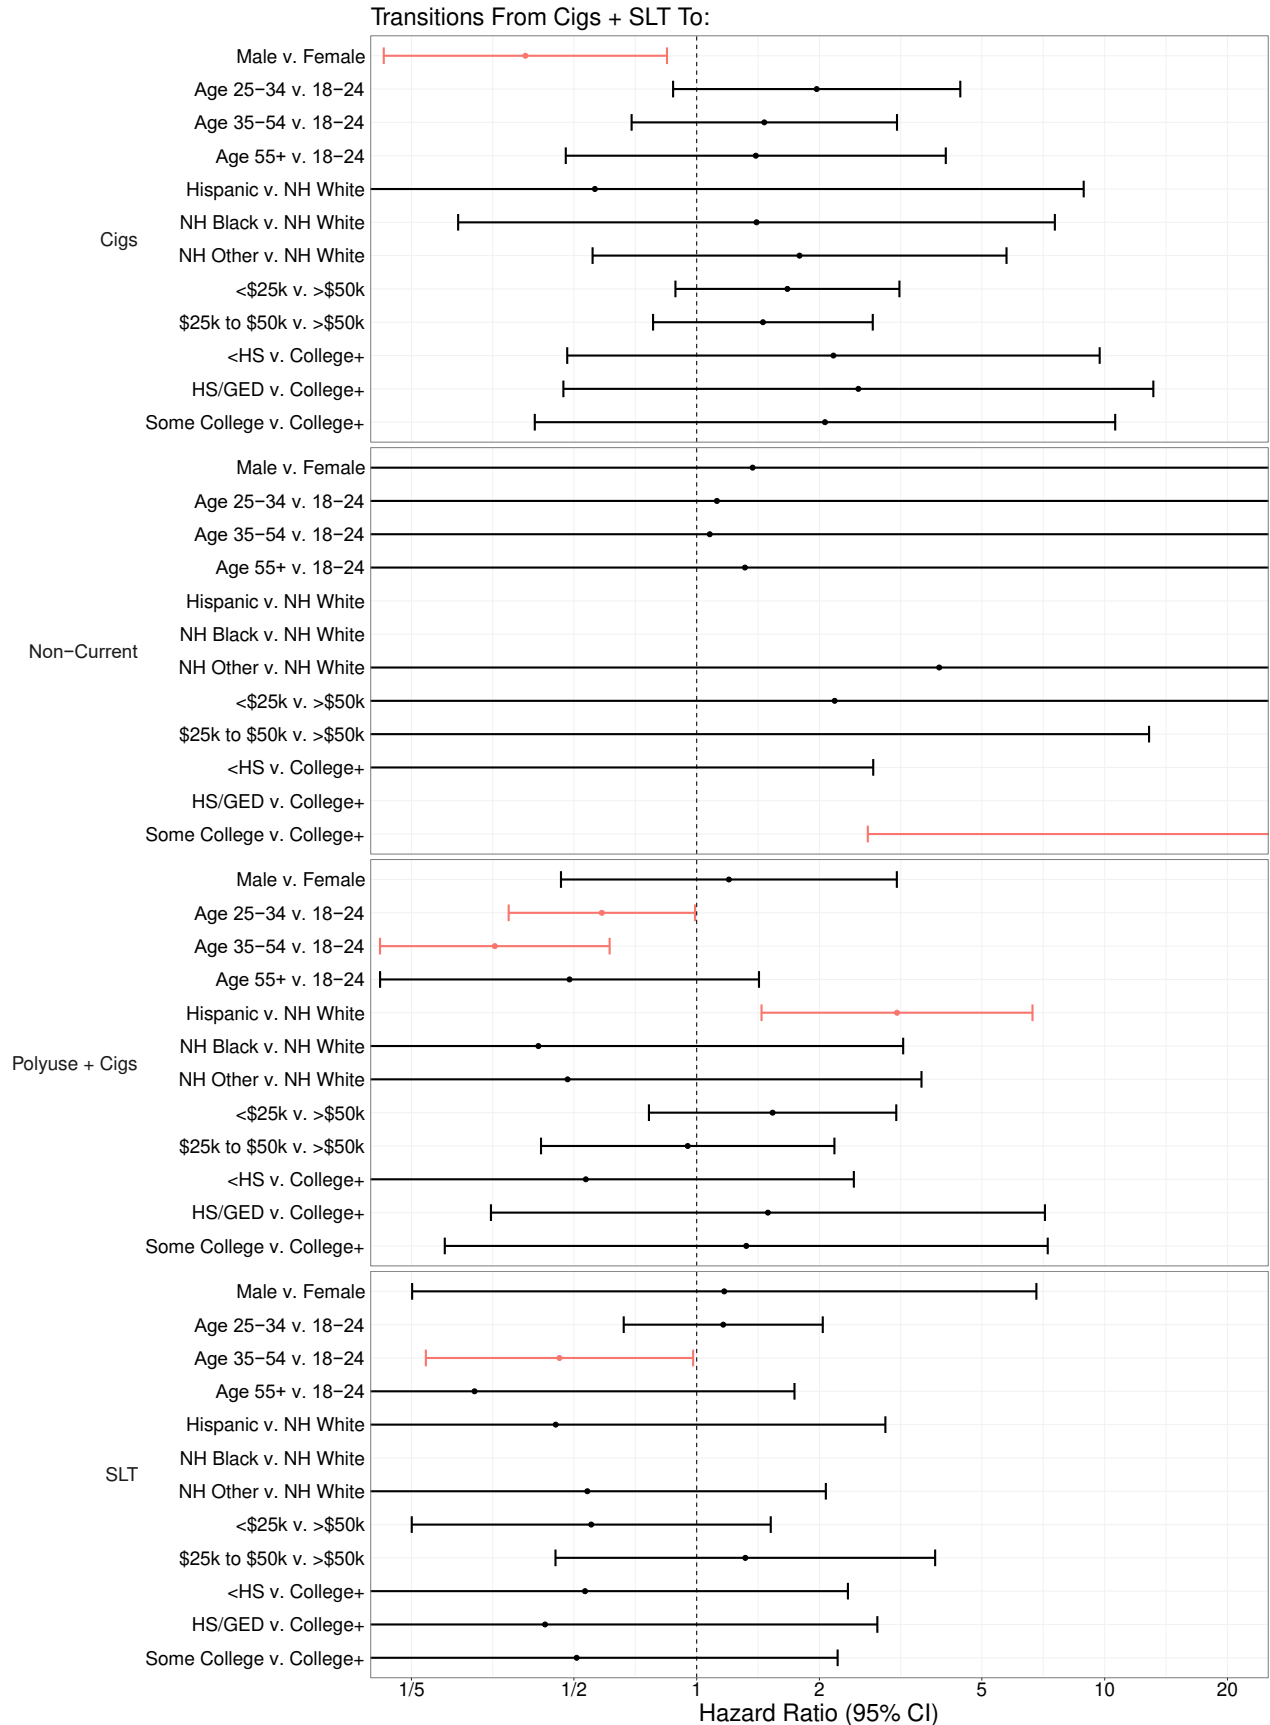

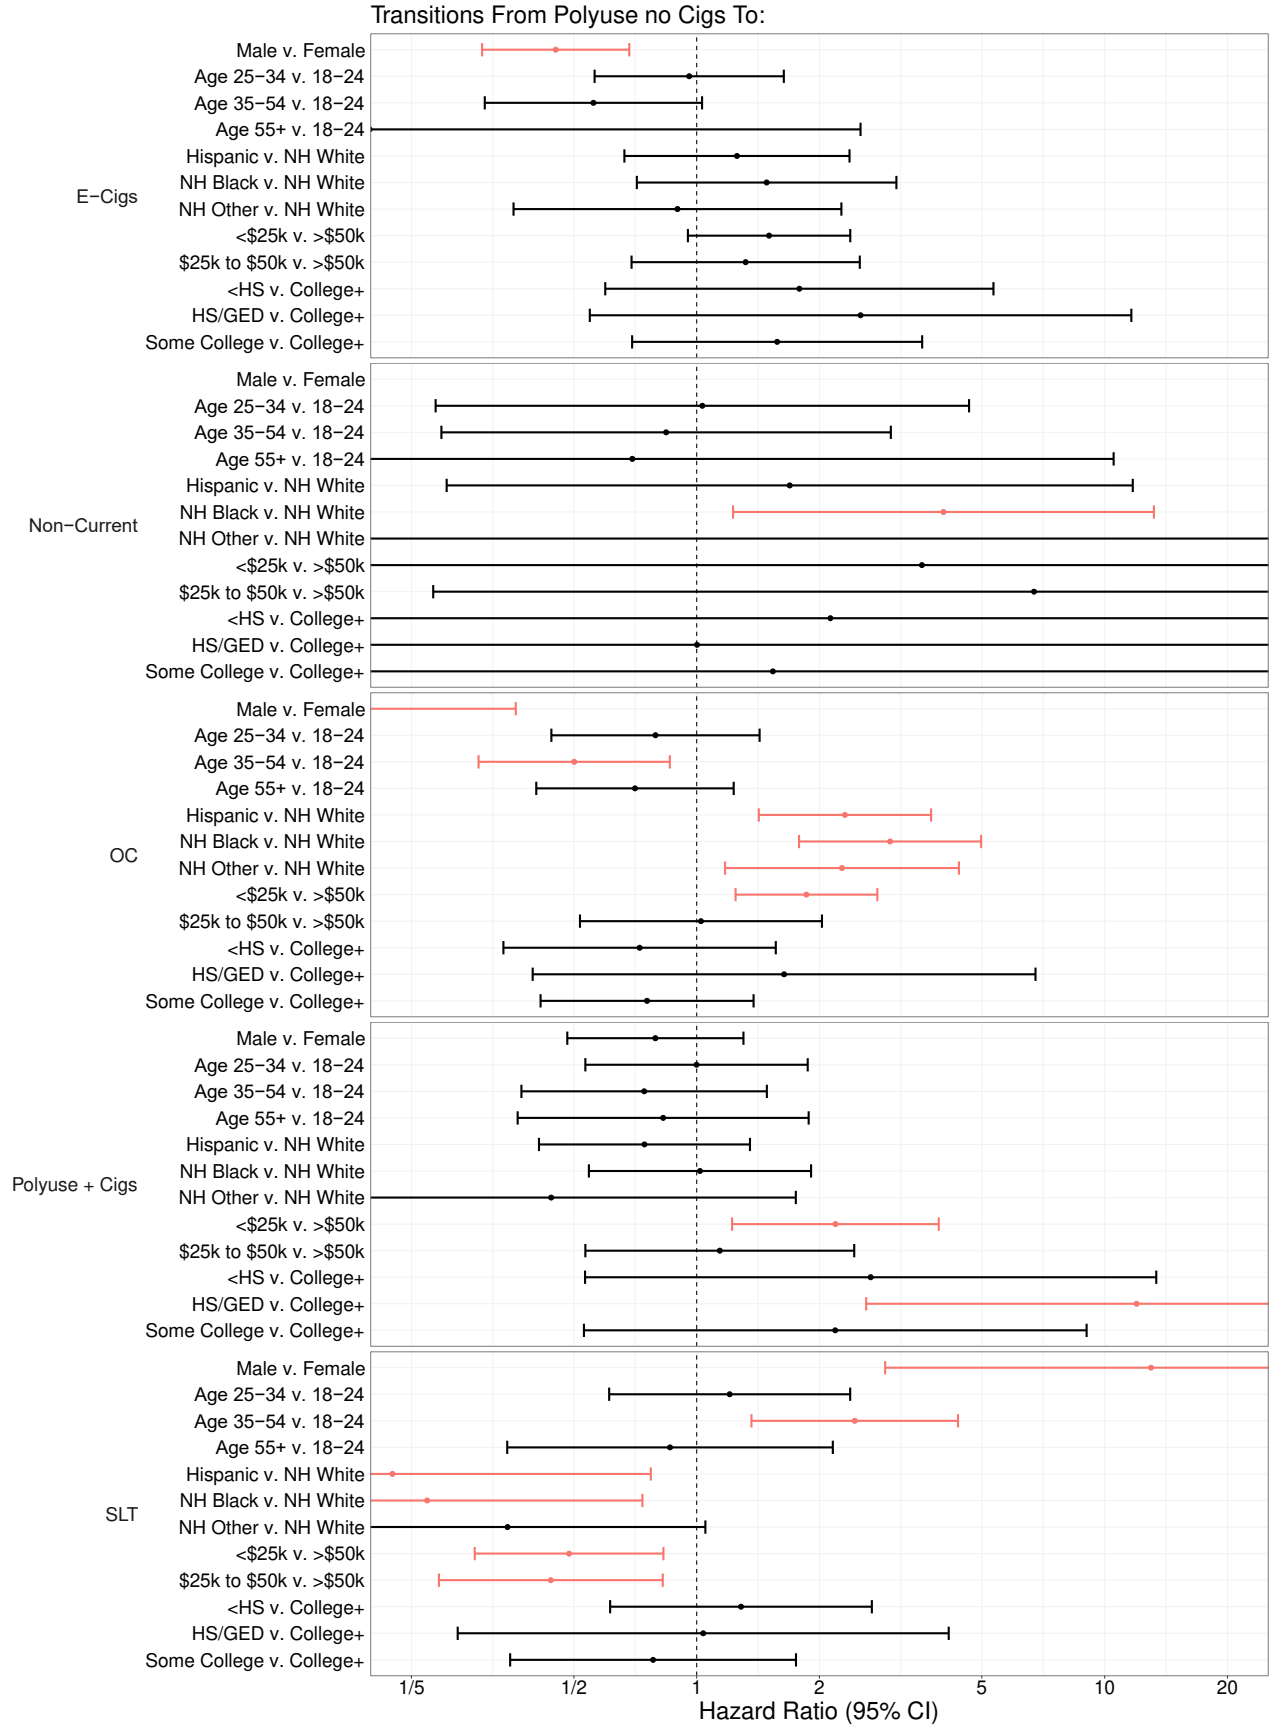

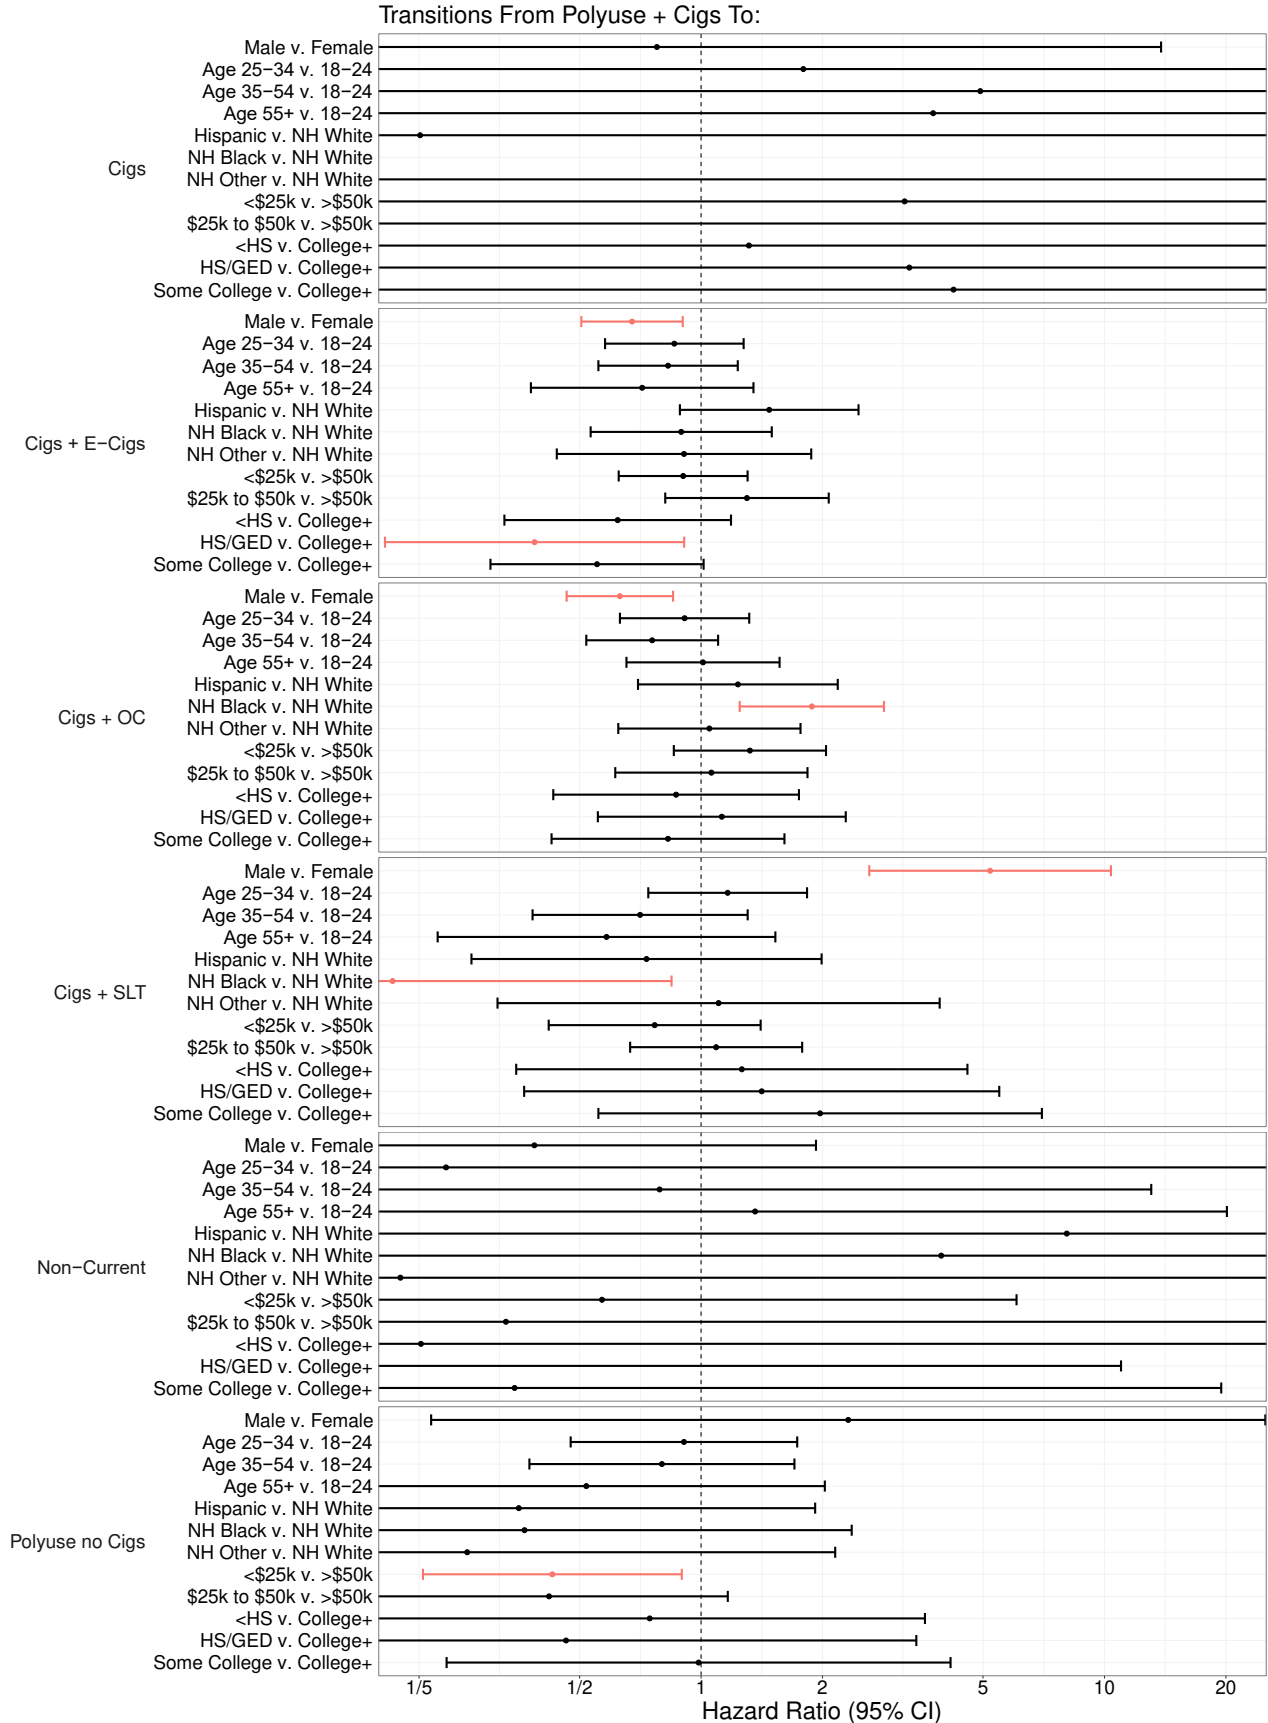

**Supplemental Table 2.** HR estimates and confidence intervals for all sociodemographic groups for each allowed transition (from univariable models). NH: Non-Hispanic, HS: high school, OC: other combustibles, SLT: smokeless tobacco. Cigs = cigarettes, E-Cigs = e-cigarettes, OC = other combustibles, SLT = smokeless tobacco, Polyuse + Cigs is any product combination of three or more products that includes cigarettes, Polyuse no Cigs is any product combination of two or more products that does not include cigarettes Sig represents significance at the  $\alpha=0.05$  level.

| Variable | Comparison     | From          | To              | HR (95% CI)           | Sig      |
|----------|----------------|---------------|-----------------|-----------------------|----------|
| Sex      | Male v. Female | Never         | Non-Current     | 1.1 (0.9, 1.4)        |          |
| Sex      | Male v. Female | Never         | Cigs            | 2.2 (1.3, 3.7)        | p < 0.05 |
| Sex      | Male v. Female | Never         | E-Cigs          | 2.6 (0.8, 8.3)        |          |
| Sex      | Male v. Female | Never         | OC              | 3.4 (1.8, 6.2)        | p < 0.05 |
| Sex      | Male v. Female | Never         | SLT             | 6.4 (0.6, 67.7)       |          |
| Sex      | Male v. Female | Non-Current   | Cigs            | 0.6 (0.5, 0.8)        | p < 0.05 |
| Sex      | Male v. Female | Non-Current   | E-Cigs          | 1.5 (1.1, 2.2)        | p < 0.05 |
| Sex      | Male v. Female | Non-Current   | OC              | 1.7 (1.4, 2.2)        | p < 0.05 |
| Sex      | Male v. Female | Non-Current   | SLT             | 13.6 (4.9, 37.7)      | p < 0.05 |
| Sex      | Male v. Female | Cigs          | Non-Current     | 1 (0.8, 1.2)          |          |
| Sex      | Male v. Female | Cigs          | Cigs + E-Cigs   | 0.8 (0.7, 1)          | p < 0.05 |
| Sex      | Male v. Female | Cigs          | Cigs + OC       | 1.7 (1.4, 2)          | p < 0.05 |
| Sex      | Male v. Female | Cigs          | Cigs + SLT      | 6.5 (2.8, 15)         | p < 0.05 |
| Sex      | Male v. Female | E-Cigs        | Non-Current     | 1 (0.8, 1.4)          |          |
| Sex      | Male v. Female | E-Cigs        | Cigs + E-Cigs   | 1.3 (0.9, 1.9)        |          |
| Sex      | Male v. Female | E-Cigs        | Polyuse no Cigs | 1.7 (0.9, 3.3)        |          |
| Sex      | Male v. Female | OC            | Non-Current     | 877.1 (11.4, 67747.3) | p < 0.05 |
| Sex      | Male v. Female | OC            | Cigs + OC       | 0.6 (0.4, 0.8)        | p < 0.05 |
| Sex      | Male v. Female | OC            | Polyuse no Cigs | 0 (0, 0.4)            | p < 0.05 |
| Sex      | Male v. Female | SLT           | Non-Current     | 0.6 (0.3, 1.2)        |          |
| Sex      | Male v. Female | SLT           | Cigs + SLT      | 0.8 (0.2, 3.1)        |          |
| Sex      | Male v. Female | SLT           | Polyuse no Cigs | 1.7 (0.3, 9.4)        |          |
| Sex      | Male v. Female | Cigs + E-Cigs | Non-Current     | 0.8 (0, 149.7)        |          |
| Sex      | Male v. Female | Cigs + E-Cigs | Cigs            | 1.1 (0.9, 1.2)        |          |
| Sex      | Male v. Female | Cigs + E-Cigs | E-Cigs          | 1.7 (1.3, 2.2)        | p < 0.05 |
| Sex      | Male v. Female | Cigs + E-Cigs | Polyuse + Cigs  | 1.9 (1.3, 2.9)        | p < 0.05 |
| Sex      | Male v. Female | Cigs + OC     | Non-Current     | 0.6 (0.3, 1.1)        |          |
| Sex      | Male v. Female | Cigs + OC     | Cigs            | 0.8 (0.6, 0.9)        | p < 0.05 |
| Sex      | Male v. Female | Cigs + OC     | OC              | 0.9 (0.6, 1.5)        |          |
| Sex      | Male v. Female | Cigs + OC     | Polyuse + Cigs  | 0.7 (0.6, 1)          | p < 0.05 |
| Sex      | Male v. Female | Cigs + SLT    | Non-Current     | 1.4 (0, 194.4)        |          |
| Sex      | Male v. Female | Cigs + SLT    | Cigs            | 0.4 (0.2, 0.9)        | p < 0.05 |
| Sex      | Male v. Female | Cigs + SLT    | SLT             | 1.2 (0.2, 6.8)        |          |
| Sex      | Male v. Female | Cigs + SLT    | Polyuse + Cigs  | 1.2 (0.5, 3.1)        |          |

|     |                    |                 |                 |                     |          |
|-----|--------------------|-----------------|-----------------|---------------------|----------|
| Sex | Male v. Female     | Polyuse + Cigs  | Non-Current     | 0.4 (0.1, 1.9)      |          |
| Sex | Male v. Female     | Polyuse + Cigs  | Cigs            | 0.8 (0, 13.8)       |          |
| Sex | Male v. Female     | Polyuse + Cigs  | Cigs + E-Cigs   | 0.7 (0.5, 0.9)      | p < 0.05 |
| Sex | Male v. Female     | Polyuse + Cigs  | Cigs + OC       | 0.6 (0.5, 0.9)      | p < 0.05 |
| Sex | Male v. Female     | Polyuse + Cigs  | Cigs + SLT      | 5.2 (2.6, 10.4)     | p < 0.05 |
| Sex | Male v. Female     | Polyuse + Cigs  | Polyuse no Cigs | 2.3 (0.2, 25.1)     |          |
| Sex | Male v. Female     | Polyuse no Cigs | Non-Current     | 0 (0, 0.2)          | p < 0.05 |
| Sex | Male v. Female     | Polyuse no Cigs | E-Cigs          | 0.5 (0.3, 0.7)      | p < 0.05 |
| Sex | Male v. Female     | Polyuse no Cigs | OC              | 0 (0, 0.4)          | p < 0.05 |
| Sex | Male v. Female     | Polyuse no Cigs | SLT             | 13 (2.9, 58.2)      | p < 0.05 |
| Sex | Male v. Female     | Polyuse no Cigs | Polyuse + Cigs  | 0.8 (0.5, 1.3)      |          |
| Age | Age 25-34 v. 18-24 | Never           | Non-Current     | 0.4 (0.3, 0.6)      | p < 0.05 |
| Age | Age 25-34 v. 18-24 | Never           | Cigs            | 1.1 (0.3, 4.2)      |          |
| Age | Age 25-34 v. 18-24 | Never           | E-Cigs          | 0.2 (0, 3.1)        |          |
| Age | Age 25-34 v. 18-24 | Never           | OC              | 0.5 (0.2, 1.1)      |          |
| Age | Age 25-34 v. 18-24 | Never           | SLT             | 254.6 (9.8, 6589.1) | p < 0.05 |
| Age | Age 25-34 v. 18-24 | Non-Current     | Cigs            | 1 (0.8, 1.2)        |          |
| Age | Age 25-34 v. 18-24 | Non-Current     | E-Cigs          | 0.4 (0.3, 0.7)      | p < 0.05 |
| Age | Age 25-34 v. 18-24 | Non-Current     | OC              | 0.6 (0.5, 0.8)      | p < 0.05 |
| Age | Age 25-34 v. 18-24 | Non-Current     | SLT             | 0.9 (0.5, 1.8)      |          |
| Age | Age 25-34 v. 18-24 | Cigs            | Non-Current     | 0.9 (0.7, 1.1)      |          |
| Age | Age 25-34 v. 18-24 | Cigs            | Cigs + E-Cigs   | 0.9 (0.7, 1.2)      |          |
| Age | Age 25-34 v. 18-24 | Cigs            | Cigs + OC       | 0.5 (0.4, 0.7)      | p < 0.05 |
| Age | Age 25-34 v. 18-24 | Cigs            | Cigs + SLT      | 0.8 (0.4, 1.5)      |          |
| Age | Age 25-34 v. 18-24 | E-Cigs          | Non-Current     | 0.6 (0.4, 0.9)      | p < 0.05 |
| Age | Age 25-34 v. 18-24 | E-Cigs          | Cigs + E-Cigs   | 1 (0.6, 1.7)        |          |
| Age | Age 25-34 v. 18-24 | E-Cigs          | Polyuse no Cigs | 0.3 (0.1, 0.6)      | p < 0.05 |
| Age | Age 25-34 v. 18-24 | OC              | Non-Current     | 1 (0.8, 1.2)        |          |
| Age | Age 25-34 v. 18-24 | OC              | Cigs + OC       | 1.6 (1, 2.4)        | p < 0.05 |
| Age | Age 25-34 v. 18-24 | OC              | Polyuse no Cigs | 0.7 (0.4, 1)        | p < 0.05 |
| Age | Age 25-34 v. 18-24 | SLT             | Non-Current     | 0.9 (0.5, 1.6)      |          |
| Age | Age 25-34 v. 18-24 | SLT             | Cigs + SLT      | 1 (0.4, 2.9)        |          |
| Age | Age 25-34 v. 18-24 | SLT             | Polyuse no Cigs | 0.4 (0.2, 0.8)      | p < 0.05 |
| Age | Age 25-34 v. 18-24 | Cigs + E-Cigs   | Non-Current     | 0.1 (0, 6.6)        |          |
| Age | Age 25-34 v. 18-24 | Cigs + E-Cigs   | Cigs            | 1 (0.7, 1.3)        |          |
| Age | Age 25-34 v. 18-24 | Cigs + E-Cigs   | E-Cigs          | 0.7 (0.5, 1.2)      |          |
| Age | Age 25-34 v. 18-24 | Cigs + E-Cigs   | Polyuse + Cigs  | 0.7 (0.4, 1.1)      |          |
| Age | Age 25-34 v. 18-24 | Cigs + OC       | Non-Current     | 0.4 (0.1, 2.5)      |          |
| Age | Age 25-34 v. 18-24 | Cigs + OC       | Cigs            | 0.8 (0.6, 1)        |          |
| Age | Age 25-34 v. 18-24 | Cigs + OC       | OC              | 1.9 (0.8, 4.2)      |          |
| Age | Age 25-34 v. 18-24 | Cigs + OC       | Polyuse + Cigs  | 0.7 (0.5, 1.1)      |          |
| Age | Age 25-34 v. 18-24 | Cigs + SLT      | Non-Current     | 1.1 (0, 626.5)      |          |

|     |                    |                 |                 |                    |          |
|-----|--------------------|-----------------|-----------------|--------------------|----------|
| Age | Age 25-34 v. 18-24 | Cigs + SLT      | Cigs            | 2 (0.9, 4.4)       |          |
| Age | Age 25-34 v. 18-24 | Cigs + SLT      | SLT             | 1.2 (0.7, 2)       |          |
| Age | Age 25-34 v. 18-24 | Cigs + SLT      | Polyuse + Cigs  | 0.6 (0.4, 1)       | p < 0.05 |
| Age | Age 25-34 v. 18-24 | Polyuse + Cigs  | Non-Current     | 0.2 (0, 70.5)      |          |
| Age | Age 25-34 v. 18-24 | Polyuse + Cigs  | Cigs            | 1.8 (0, 226.3)     |          |
| Age | Age 25-34 v. 18-24 | Polyuse + Cigs  | Cigs + E-Cigs   | 0.9 (0.6, 1.3)     |          |
| Age | Age 25-34 v. 18-24 | Polyuse + Cigs  | Cigs + OC       | 0.9 (0.6, 1.3)     |          |
| Age | Age 25-34 v. 18-24 | Polyuse + Cigs  | Cigs + SLT      | 1.2 (0.7, 1.8)     |          |
| Age | Age 25-34 v. 18-24 | Polyuse + Cigs  | Polyuse no Cigs | 0.9 (0.5, 1.7)     |          |
| Age | Age 25-34 v. 18-24 | Polyuse no Cigs | Non-Current     | 1 (0.2, 4.7)       |          |
| Age | Age 25-34 v. 18-24 | Polyuse no Cigs | E-Cigs          | 1 (0.6, 1.6)       |          |
| Age | Age 25-34 v. 18-24 | Polyuse no Cigs | OC              | 0.8 (0.4, 1.4)     |          |
| Age | Age 25-34 v. 18-24 | Polyuse no Cigs | SLT             | 1.2 (0.6, 2.4)     |          |
| Age | Age 25-34 v. 18-24 | Polyuse no Cigs | Polyuse + Cigs  | 1 (0.5, 1.9)       |          |
| Age | Age 35-54 v. 18-24 | Never           | Non-Current     | 0.3 (0.2, 0.4)     | p < 0.05 |
| Age | Age 35-54 v. 18-24 | Never           | Cigs            | 2 (0.8, 4.7)       |          |
| Age | Age 35-54 v. 18-24 | Never           | E-Cigs          | 0.1 (0, 0.7)       | p < 0.05 |
| Age | Age 35-54 v. 18-24 | Never           | OC              | 0.2 (0.1, 0.5)     | p < 0.05 |
| Age | Age 35-54 v. 18-24 | Never           | SLT             | 75.8 (2.8, 2081.7) | p < 0.05 |
| Age | Age 35-54 v. 18-24 | Non-Current     | Cigs            | 0.7 (0.5, 0.8)     | p < 0.05 |
| Age | Age 35-54 v. 18-24 | Non-Current     | E-Cigs          | 0.2 (0.1, 0.3)     | p < 0.05 |
| Age | Age 35-54 v. 18-24 | Non-Current     | OC              | 0.2 (0.2, 0.3)     | p < 0.05 |
| Age | Age 35-54 v. 18-24 | Non-Current     | SLT             | 0.6 (0.3, 1.2)     |          |
| Age | Age 35-54 v. 18-24 | Cigs            | Non-Current     | 0.5 (0.4, 0.7)     | p < 0.05 |
| Age | Age 35-54 v. 18-24 | Cigs            | Cigs + E-Cigs   | 0.8 (0.6, 1)       | p < 0.05 |
| Age | Age 35-54 v. 18-24 | Cigs            | Cigs + OC       | 0.4 (0.3, 0.6)     | p < 0.05 |
| Age | Age 35-54 v. 18-24 | Cigs            | Cigs + SLT      | 0.3 (0.2, 0.5)     | p < 0.05 |
| Age | Age 35-54 v. 18-24 | E-Cigs          | Non-Current     | 0.5 (0.3, 0.7)     | p < 0.05 |
| Age | Age 35-54 v. 18-24 | E-Cigs          | Cigs + E-Cigs   | 0.8 (0.5, 1.3)     |          |
| Age | Age 35-54 v. 18-24 | E-Cigs          | Polyuse no Cigs | 0.1 (0, 0.3)       | p < 0.05 |
| Age | Age 35-54 v. 18-24 | OC              | Non-Current     | 0.6 (0.5, 0.8)     | p < 0.05 |
| Age | Age 35-54 v. 18-24 | OC              | Cigs + OC       | 1 (0.6, 1.5)       |          |
| Age | Age 35-54 v. 18-24 | OC              | Polyuse no Cigs | 0.3 (0.2, 0.4)     | p < 0.05 |
| Age | Age 35-54 v. 18-24 | SLT             | Non-Current     | 0.4 (0.3, 0.7)     | p < 0.05 |
| Age | Age 35-54 v. 18-24 | SLT             | Cigs + SLT      | 0.2 (0.1, 0.6)     | p < 0.05 |
| Age | Age 35-54 v. 18-24 | SLT             | Polyuse no Cigs | 0.2 (0.1, 0.4)     | p < 0.05 |
| Age | Age 35-54 v. 18-24 | Cigs + E-Cigs   | Non-Current     | 33.8 (1.7, 668.8)  | p < 0.05 |
| Age | Age 35-54 v. 18-24 | Cigs + E-Cigs   | Cigs            | 1 (0.8, 1.2)       |          |
| Age | Age 35-54 v. 18-24 | Cigs + E-Cigs   | E-Cigs          | 0.4 (0.3, 0.6)     | p < 0.05 |
| Age | Age 35-54 v. 18-24 | Cigs + E-Cigs   | Polyuse + Cigs  | 0.3 (0.2, 0.6)     | p < 0.05 |
| Age | Age 35-54 v. 18-24 | Cigs + OC       | Non-Current     | 0.4 (0.2, 0.8)     | p < 0.05 |
| Age | Age 35-54 v. 18-24 | Cigs + OC       | Cigs            | 0.9 (0.7, 1.1)     |          |

|     |                    |                 |                 |                  |          |
|-----|--------------------|-----------------|-----------------|------------------|----------|
| Age | Age 35-54 v. 18-24 | Cigs + OC       | OC              | 0.9 (0.3, 2.2)   |          |
| Age | Age 35-54 v. 18-24 | Cigs + OC       | Polyuse + Cigs  | 0.5 (0.4, 0.7)   | p < 0.05 |
| Age | Age 35-54 v. 18-24 | Cigs + SLT      | Non-Current     | 1.1 (0, 211.1)   |          |
| Age | Age 35-54 v. 18-24 | Cigs + SLT      | Cigs            | 1.5 (0.7, 3.1)   |          |
| Age | Age 35-54 v. 18-24 | Cigs + SLT      | SLT             | 0.5 (0.2, 1)     | p < 0.05 |
| Age | Age 35-54 v. 18-24 | Cigs + SLT      | Polyuse + Cigs  | 0.3 (0.2, 0.6)   | p < 0.05 |
| Age | Age 35-54 v. 18-24 | Polyuse + Cigs  | Non-Current     | 0.8 (0.1, 13.1)  |          |
| Age | Age 35-54 v. 18-24 | Polyuse + Cigs  | Cigs            | 4.9 (0.1, 177)   |          |
| Age | Age 35-54 v. 18-24 | Polyuse + Cigs  | Cigs + E-Cigs   | 0.8 (0.6, 1.2)   |          |
| Age | Age 35-54 v. 18-24 | Polyuse + Cigs  | Cigs + OC       | 0.8 (0.5, 1.1)   |          |
| Age | Age 35-54 v. 18-24 | Polyuse + Cigs  | Cigs + SLT      | 0.7 (0.4, 1.3)   |          |
| Age | Age 35-54 v. 18-24 | Polyuse + Cigs  | Polyuse no Cigs | 0.8 (0.4, 1.7)   |          |
| Age | Age 35-54 v. 18-24 | Polyuse no Cigs | Non-Current     | 0.8 (0.2, 3)     |          |
| Age | Age 35-54 v. 18-24 | Polyuse no Cigs | E-Cigs          | 0.6 (0.3, 1)     |          |
| Age | Age 35-54 v. 18-24 | Polyuse no Cigs | OC              | 0.5 (0.3, 0.9)   | p < 0.05 |
| Age | Age 35-54 v. 18-24 | Polyuse no Cigs | SLT             | 2.4 (1.4, 4.4)   | p < 0.05 |
| Age | Age 35-54 v. 18-24 | Polyuse no Cigs | Polyuse + Cigs  | 0.7 (0.4, 1.5)   |          |
| Age | Age 55+ v. 18-24   | Never           | Non-Current     | 0.3 (0.2, 0.4)   | p < 0.05 |
| Age | Age 55+ v. 18-24   | Never           | Cigs            | 1.7 (0.7, 4.2)   |          |
| Age | Age 55+ v. 18-24   | Never           | E-Cigs          | 0 (0, 0.7)       | p < 0.05 |
| Age | Age 55+ v. 18-24   | Never           | OC              | 0.1 (0, 0.3)     | p < 0.05 |
| Age | Age 55+ v. 18-24   | Never           | SLT             | 3.5 (0, 1519.6)  |          |
| Age | Age 55+ v. 18-24   | Non-Current     | Cigs            | 0.4 (0.3, 0.5)   | p < 0.05 |
| Age | Age 55+ v. 18-24   | Non-Current     | E-Cigs          | 0.1 (0.1, 0.2)   | p < 0.05 |
| Age | Age 55+ v. 18-24   | Non-Current     | OC              | 0.1 (0, 0.1)     | p < 0.05 |
| Age | Age 55+ v. 18-24   | Non-Current     | SLT             | 0.3 (0.2, 0.6)   | p < 0.05 |
| Age | Age 55+ v. 18-24   | Cigs            | Non-Current     | 0.7 (0.6, 0.9)   | p < 0.05 |
| Age | Age 55+ v. 18-24   | Cigs            | Cigs + E-Cigs   | 0.5 (0.3, 0.6)   | p < 0.05 |
| Age | Age 55+ v. 18-24   | Cigs            | Cigs + OC       | 0.2 (0.2, 0.3)   | p < 0.05 |
| Age | Age 55+ v. 18-24   | Cigs            | Cigs + SLT      | 0.1 (0, 0.2)     | p < 0.05 |
| Age | Age 55+ v. 18-24   | E-Cigs          | Non-Current     | 0.3 (0.2, 0.5)   | p < 0.05 |
| Age | Age 55+ v. 18-24   | E-Cigs          | Cigs + E-Cigs   | 0.5 (0.3, 0.9)   | p < 0.05 |
| Age | Age 55+ v. 18-24   | E-Cigs          | Polyuse no Cigs | 0.1 (0, 0.3)     | p < 0.05 |
| Age | Age 55+ v. 18-24   | OC              | Non-Current     | 0.4 (0.3, 0.5)   | p < 0.05 |
| Age | Age 55+ v. 18-24   | OC              | Cigs + OC       | 1.1 (0.7, 1.7)   |          |
| Age | Age 55+ v. 18-24   | OC              | Polyuse no Cigs | 0.1 (0.1, 0.2)   | p < 0.05 |
| Age | Age 55+ v. 18-24   | SLT             | Non-Current     | 0.6 (0.4, 1)     | p < 0.05 |
| Age | Age 55+ v. 18-24   | SLT             | Cigs + SLT      | 0.1 (0, 0.3)     | p < 0.05 |
| Age | Age 55+ v. 18-24   | SLT             | Polyuse no Cigs | 0.1 (0, 0.2)     | p < 0.05 |
| Age | Age 55+ v. 18-24   | Cigs + E-Cigs   | Non-Current     | 11.4 (0.1, 1129) |          |
| Age | Age 55+ v. 18-24   | Cigs + E-Cigs   | Cigs            | 0.9 (0.7, 1.2)   |          |
| Age | Age 55+ v. 18-24   | Cigs + E-Cigs   | E-Cigs          | 0.5 (0.3, 0.8)   | p < 0.05 |



|                |                      |                 |                 |                  |          |
|----------------|----------------------|-----------------|-----------------|------------------|----------|
| Age            | Age 55+ v. 18-24     | Cigs + E-Cigs   | Polyuse + Cigs  | 0.2 (0.1, 0.4)   | p < 0.05 |
| Age            | Age 55+ v. 18-24     | Cigs + OC       | Non-Current     | 0.2 (0, 6.3)     |          |
| Age            | Age 55+ v. 18-24     | Cigs + OC       | Cigs            | 0.6 (0.5, 0.8)   | p < 0.05 |
| Age            | Age 55+ v. 18-24     | Cigs + OC       | OC              | 1.9 (0.7, 5)     |          |
| Age            | Age 55+ v. 18-24     | Cigs + OC       | Polyuse + Cigs  | 0.4 (0.2, 0.6)   | p < 0.05 |
| Age            | Age 55+ v. 18-24     | Cigs + SLT      | Non-Current     | 1.3 (0, 5881.6)  |          |
| Age            | Age 55+ v. 18-24     | Cigs + SLT      | Cigs            | 1.4 (0.5, 4.1)   |          |
| Age            | Age 55+ v. 18-24     | Cigs + SLT      | SLT             | 0.3 (0.1, 1.7)   |          |
| Age            | Age 55+ v. 18-24     | Cigs + SLT      | Polyuse + Cigs  | 0.5 (0.2, 1.4)   |          |
| Age            | Age 55+ v. 18-24     | Polyuse + Cigs  | Non-Current     | 1.4 (0.1, 20.1)  |          |
| Age            | Age 55+ v. 18-24     | Polyuse + Cigs  | Cigs            | 3.8 (0.1, 286.4) |          |
| Age            | Age 55+ v. 18-24     | Polyuse + Cigs  | Cigs + E-Cigs   | 0.7 (0.4, 1.4)   |          |
| Age            | Age 55+ v. 18-24     | Polyuse + Cigs  | Cigs + OC       | 1 (0.7, 1.6)     |          |
| Age            | Age 55+ v. 18-24     | Polyuse + Cigs  | Cigs + SLT      | 0.6 (0.2, 1.5)   |          |
| Age            | Age 55+ v. 18-24     | Polyuse + Cigs  | Polyuse no Cigs | 0.5 (0.1, 2)     |          |
| Age            | Age 55+ v. 18-24     | Polyuse no Cigs | Non-Current     | 0.7 (0.1, 10.5)  |          |
| Age            | Age 55+ v. 18-24     | Polyuse no Cigs | E-Cigs          | 0.2 (0, 2.5)     |          |
| Age            | Age 55+ v. 18-24     | Polyuse no Cigs | OC              | 0.7 (0.4, 1.2)   |          |
| Age            | Age 55+ v. 18-24     | Polyuse no Cigs | SLT             | 0.9 (0.3, 2.2)   |          |
| Age            | Age 55+ v. 18-24     | Polyuse no Cigs | Polyuse + Cigs  | 0.8 (0.4, 1.9)   |          |
| Race/Ethnicity | Hispanic v. NH White | Never           | Non-Current     | 1.7 (1.3, 2.4)   | p < 0.05 |
| Race/Ethnicity | Hispanic v. NH White | Never           | Cigs            | 3.1 (1.5, 6.5)   | p < 0.05 |
| Race/Ethnicity | Hispanic v. NH White | Never           | E-Cigs          | 2 (0.4, 11.6)    |          |
| Race/Ethnicity | Hispanic v. NH White | Never           | OC              | 1.2 (0.3, 5.4)   |          |
| Race/Ethnicity | Hispanic v. NH White | Never           | SLT             | 0 (0, 0)         | p < 0.05 |
| Race/Ethnicity | Hispanic v. NH White | Non-Current     | Cigs            | 1.9 (1.4, 2.5)   | p < 0.05 |
| Race/Ethnicity | Hispanic v. NH White | Non-Current     | E-Cigs          | 3.1 (1.9, 5.3)   | p < 0.05 |
| Race/Ethnicity | Hispanic v. NH White | Non-Current     | OC              | 2.2 (1.6, 3)     | p < 0.05 |
| Race/Ethnicity | Hispanic v. NH White | Non-Current     | SLT             | 0.3 (0.1, 0.9)   | p < 0.05 |
| Race/Ethnicity | Hispanic v. NH White | Cigs            | Non-Current     | 1.7 (1.4, 2.2)   | p < 0.05 |
| Race/Ethnicity | Hispanic v. NH White | Cigs            | Cigs + E-Cigs   | 0.6 (0.4, 0.9)   | p < 0.05 |
| Race/Ethnicity | Hispanic v. NH White | Cigs            | Cigs + OC       | 1.5 (0.8, 2.8)   |          |
| Race/Ethnicity | Hispanic v. NH White | Cigs            | Cigs + SLT      | 0.2 (0, 2.2)     |          |
| Race/Ethnicity | Hispanic v. NH White | E-Cigs          | Non-Current     | 2.8 (1.9, 4.2)   | p < 0.05 |
| Race/Ethnicity | Hispanic v. NH White | E-Cigs          | Cigs + E-Cigs   | 1.5 (0.9, 2.4)   |          |
| Race/Ethnicity | Hispanic v. NH White | E-Cigs          | Polyuse no Cigs | 3 (1.5, 5.8)     | p < 0.05 |
| Race/Ethnicity | Hispanic v. NH White | OC              | Non-Current     | 1.6 (1.3, 2)     | p < 0.05 |
| Race/Ethnicity | Hispanic v. NH White | OC              | Cigs + OC       | 2 (0.9, 4.2)     |          |
| Race/Ethnicity | Hispanic v. NH White | OC              | Polyuse no Cigs | 2.5 (1.8, 3.6)   | p < 0.05 |
| Race/Ethnicity | Hispanic v. NH White | SLT             | Non-Current     | 3.2 (1.6, 6.5)   | p < 0.05 |
| Race/Ethnicity | Hispanic v. NH White | SLT             | Cigs + SLT      | 0.5 (0, 1958.1)  |          |
| Race/Ethnicity | Hispanic v. NH White | SLT             | Polyuse no Cigs | 1.9 (0.3, 11.8)  |          |

|                |                      |                 |                 |                  |          |
|----------------|----------------------|-----------------|-----------------|------------------|----------|
| Race/Ethnicity | Hispanic v. NH White | Cigs + E-Cigs   | Non-Current     | 0.1 (0, 589.3)   |          |
| Race/Ethnicity | Hispanic v. NH White | Cigs + E-Cigs   | Cigs            | 1.4 (1.1, 1.7)   | p < 0.05 |
| Race/Ethnicity | Hispanic v. NH White | Cigs + E-Cigs   | E-Cigs          | 1.6 (1, 2.4)     | p < 0.05 |
| Race/Ethnicity | Hispanic v. NH White | Cigs + E-Cigs   | Polyuse + Cigs  | 2.4 (1.1, 5.1)   | p < 0.05 |
| Race/Ethnicity | Hispanic v. NH White | Cigs + OC       | Non-Current     | 1.4 (0.6, 3.3)   |          |
| Race/Ethnicity | Hispanic v. NH White | Cigs + OC       | Cigs            | 1.1 (0.8, 1.6)   |          |
| Race/Ethnicity | Hispanic v. NH White | Cigs + OC       | OC              | 1.3 (0.1, 22.8)  |          |
| Race/Ethnicity | Hispanic v. NH White | Cigs + OC       | Polyuse + Cigs  | 1.1 (0.6, 2)     |          |
| Race/Ethnicity | Hispanic v. NH White | Cigs + SLT      | Non-Current     | 0 (0, 0)         | p < 0.05 |
| Race/Ethnicity | Hispanic v. NH White | Cigs + SLT      | Cigs            | 0.6 (0, 8.9)     |          |
| Race/Ethnicity | Hispanic v. NH White | Cigs + SLT      | SLT             | 0.5 (0.1, 2.9)   |          |
| Race/Ethnicity | Hispanic v. NH White | Cigs + SLT      | Polyuse + Cigs  | 3.1 (1.4, 6.7)   | p < 0.05 |
| Race/Ethnicity | Hispanic v. NH White | Polyuse + Cigs  | Non-Current     | 8.1 (0.1, 519.8) |          |
| Race/Ethnicity | Hispanic v. NH White | Polyuse + Cigs  | Cigs            | 0.2 (0, 112.2)   |          |
| Race/Ethnicity | Hispanic v. NH White | Polyuse + Cigs  | Cigs + E-Cigs   | 1.5 (0.9, 2.5)   |          |
| Race/Ethnicity | Hispanic v. NH White | Polyuse + Cigs  | Cigs + OC       | 1.2 (0.7, 2.2)   |          |
| Race/Ethnicity | Hispanic v. NH White | Polyuse + Cigs  | Cigs + SLT      | 0.7 (0.3, 2)     |          |
| Race/Ethnicity | Hispanic v. NH White | Polyuse + Cigs  | Polyuse no Cigs | 0.4 (0.1, 1.9)   |          |
| Race/Ethnicity | Hispanic v. NH White | Polyuse no Cigs | Non-Current     | 1.7 (0.2, 11.7)  |          |
| Race/Ethnicity | Hispanic v. NH White | Polyuse no Cigs | E-Cigs          | 1.3 (0.7, 2.4)   |          |
| Race/Ethnicity | Hispanic v. NH White | Polyuse no Cigs | OC              | 2.3 (1.4, 3.8)   | p < 0.05 |
| Race/Ethnicity | Hispanic v. NH White | Polyuse no Cigs | SLT             | 0.2 (0, 0.8)     | p < 0.05 |
| Race/Ethnicity | Hispanic v. NH White | Polyuse no Cigs | Polyuse + Cigs  | 0.7 (0.4, 1.4)   |          |
| Race/Ethnicity | NH Black v. NH White | Never           | Non-Current     | 1.9 (1.4, 2.7)   | p < 0.05 |
| Race/Ethnicity | NH Black v. NH White | Never           | Cigs            | 3.7 (2, 7)       | p < 0.05 |
| Race/Ethnicity | NH Black v. NH White | Never           | E-Cigs          | 1.6 (0.2, 15.9)  |          |
| Race/Ethnicity | NH Black v. NH White | Never           | OC              | 2.2 (1, 4.8)     | p < 0.05 |
| Race/Ethnicity | NH Black v. NH White | Never           | SLT             | 10 (0, 3062)     |          |
| Race/Ethnicity | NH Black v. NH White | Non-Current     | Cigs            | 1.5 (1.1, 1.9)   | p < 0.05 |
| Race/Ethnicity | NH Black v. NH White | Non-Current     | E-Cigs          | 1.5 (0.8, 2.9)   |          |
| Race/Ethnicity | NH Black v. NH White | Non-Current     | OC              | 3.1 (2.3, 4.2)   | p < 0.05 |
| Race/Ethnicity | NH Black v. NH White | Non-Current     | SLT             | 0.6 (0.2, 2)     |          |
| Race/Ethnicity | NH Black v. NH White | Cigs            | Non-Current     | 0.8 (0.6, 1.1)   |          |
| Race/Ethnicity | NH Black v. NH White | Cigs            | Cigs + E-Cigs   | 0.5 (0.3, 0.7)   | p < 0.05 |
| Race/Ethnicity | NH Black v. NH White | Cigs            | Cigs + OC       | 1.8 (1.5, 2.3)   | p < 0.05 |
| Race/Ethnicity | NH Black v. NH White | Cigs            | Cigs + SLT      | 0.1 (0, 0.7)     | p < 0.05 |
| Race/Ethnicity | NH Black v. NH White | E-Cigs          | Non-Current     | 2.3 (1.5, 3.6)   | p < 0.05 |
| Race/Ethnicity | NH Black v. NH White | E-Cigs          | Cigs + E-Cigs   | 0.7 (0.3, 1.9)   |          |
| Race/Ethnicity | NH Black v. NH White | E-Cigs          | Polyuse no Cigs | 1.8 (0.5, 6.8)   |          |
| Race/Ethnicity | NH Black v. NH White | OC              | Non-Current     | 1.1 (0.8, 1.4)   |          |
| Race/Ethnicity | NH Black v. NH White | OC              | Cigs + OC       | 1.7 (1.1, 2.7)   | p < 0.05 |
| Race/Ethnicity | NH Black v. NH White | OC              | Polyuse no Cigs | 2.7 (1.8, 4)     | p < 0.05 |

|                |                      |                 |                 |                    |          |
|----------------|----------------------|-----------------|-----------------|--------------------|----------|
| Race/Ethnicity | NH Black v. NH White | SLT             | Non-Current     | 2.6 (0.9, 7.8)     |          |
| Race/Ethnicity | NH Black v. NH White | SLT             | Cigs + SLT      | 0.2 (0, 2.3)       |          |
| Race/Ethnicity | NH Black v. NH White | SLT             | Polyuse no Cigs | 1.4 (0.3, 7.6)     |          |
| Race/Ethnicity | NH Black v. NH White | Cigs + E-Cigs   | Non-Current     | 0 (0, 0)           | p < 0.05 |
| Race/Ethnicity | NH Black v. NH White | Cigs + E-Cigs   | Cigs            | 1.1 (0.8, 1.4)     |          |
| Race/Ethnicity | NH Black v. NH White | Cigs + E-Cigs   | E-Cigs          | 1.1 (0.6, 2.1)     |          |
| Race/Ethnicity | NH Black v. NH White | Cigs + E-Cigs   | Polyuse + Cigs  | 2.1 (1.1, 4)       | p < 0.05 |
| Race/Ethnicity | NH Black v. NH White | Cigs + OC       | Non-Current     | 0.2 (0, 124.7)     |          |
| Race/Ethnicity | NH Black v. NH White | Cigs + OC       | Cigs            | 1 (0.7, 1.3)       |          |
| Race/Ethnicity | NH Black v. NH White | Cigs + OC       | OC              | 1.1 (0.6, 2.1)     |          |
| Race/Ethnicity | NH Black v. NH White | Cigs + OC       | Polyuse + Cigs  | 0.7 (0.5, 1.1)     |          |
| Race/Ethnicity | NH Black v. NH White | Cigs + SLT      | Non-Current     | 0 (0, 0)           | p < 0.05 |
| Race/Ethnicity | NH Black v. NH White | Cigs + SLT      | Cigs            | 1.4 (0.3, 7.6)     |          |
| Race/Ethnicity | NH Black v. NH White | Cigs + SLT      | SLT             | 0 (0, 0)           | p < 0.05 |
| Race/Ethnicity | NH Black v. NH White | Cigs + SLT      | Polyuse + Cigs  | 0.4 (0.1, 3.2)     |          |
| Race/Ethnicity | NH Black v. NH White | Polyuse + Cigs  | Non-Current     | 3.9 (0.1, 325.8)   |          |
| Race/Ethnicity | NH Black v. NH White | Polyuse + Cigs  | Cigs            | 0 (0, 0)           | p < 0.05 |
| Race/Ethnicity | NH Black v. NH White | Polyuse + Cigs  | Cigs + E-Cigs   | 0.9 (0.5, 1.5)     |          |
| Race/Ethnicity | NH Black v. NH White | Polyuse + Cigs  | Cigs + OC       | 1.9 (1.3, 2.8)     | p < 0.05 |
| Race/Ethnicity | NH Black v. NH White | Polyuse + Cigs  | Cigs + SLT      | 0.2 (0, 0.8)       | p < 0.05 |
| Race/Ethnicity | NH Black v. NH White | Polyuse + Cigs  | Polyuse no Cigs | 0.4 (0.1, 2.4)     |          |
| Race/Ethnicity | NH Black v. NH White | Polyuse no Cigs | Non-Current     | 4 (1.2, 13.2)      | p < 0.05 |
| Race/Ethnicity | NH Black v. NH White | Polyuse no Cigs | E-Cigs          | 1.5 (0.7, 3.1)     |          |
| Race/Ethnicity | NH Black v. NH White | Polyuse no Cigs | OC              | 3 (1.8, 5)         | p < 0.05 |
| Race/Ethnicity | NH Black v. NH White | Polyuse no Cigs | SLT             | 0.2 (0.1, 0.7)     | p < 0.05 |
| Race/Ethnicity | NH Black v. NH White | Polyuse no Cigs | Polyuse + Cigs  | 1 (0.5, 1.9)       |          |
| Race/Ethnicity | NH Other v. NH White | Never           | Non-Current     | 1.2 (0.7, 2.4)     |          |
| Race/Ethnicity | NH Other v. NH White | Never           | Cigs            | 0.8 (0.3, 2.3)     |          |
| Race/Ethnicity | NH Other v. NH White | Never           | E-Cigs          | 1.1 (0.1, 24.6)    |          |
| Race/Ethnicity | NH Other v. NH White | Never           | OC              | 0.8 (0.2, 2.9)     |          |
| Race/Ethnicity | NH Other v. NH White | Never           | SLT             | 37.7 (0.2, 9242.7) |          |
| Race/Ethnicity | NH Other v. NH White | Non-Current     | Cigs            | 1.1 (0.7, 1.7)     |          |
| Race/Ethnicity | NH Other v. NH White | Non-Current     | E-Cigs          | 1.5 (0.6, 3.7)     |          |
| Race/Ethnicity | NH Other v. NH White | Non-Current     | OC              | 1.4 (0.9, 2.2)     |          |
| Race/Ethnicity | NH Other v. NH White | Non-Current     | SLT             | 0.4 (0.1, 2)       |          |
| Race/Ethnicity | NH Other v. NH White | Cigs            | Non-Current     | 1.7 (1.1, 2.6)     | p < 0.05 |
| Race/Ethnicity | NH Other v. NH White | Cigs            | Cigs + E-Cigs   | 1.2 (0.8, 1.9)     |          |
| Race/Ethnicity | NH Other v. NH White | Cigs            | Cigs + OC       | 1.3 (0.8, 2.1)     |          |
| Race/Ethnicity | NH Other v. NH White | Cigs            | Cigs + SLT      | 1.1 (0.4, 3.5)     |          |
| Race/Ethnicity | NH Other v. NH White | E-Cigs          | Non-Current     | 1.3 (0.6, 2.6)     |          |
| Race/Ethnicity | NH Other v. NH White | E-Cigs          | Cigs + E-Cigs   | 1.5 (0.6, 3.9)     |          |
| Race/Ethnicity | NH Other v. NH White | E-Cigs          | Polyuse no Cigs | 1.6 (0.4, 6)       |          |

|                |                      |                 |                 |                   |          |
|----------------|----------------------|-----------------|-----------------|-------------------|----------|
| Race/Ethnicity | NH Other v. NH White | OC              | Non-Current     | 1.4 (1.1, 1.7)    | p < 0.05 |
| Race/Ethnicity | NH Other v. NH White | OC              | Cigs + OC       | 1.2 (0.5, 2.9)    |          |
| Race/Ethnicity | NH Other v. NH White | OC              | Polyuse no Cigs | 2.2 (1.2, 4.1)    | p < 0.05 |
| Race/Ethnicity | NH Other v. NH White | SLT             | Non-Current     | 1.8 (0.8, 4.2)    |          |
| Race/Ethnicity | NH Other v. NH White | SLT             | Cigs + SLT      | 0.4 (0.1, 4.2)    |          |
| Race/Ethnicity | NH Other v. NH White | SLT             | Polyuse no Cigs | 1.1 (0.2, 4.7)    |          |
| Race/Ethnicity | NH Other v. NH White | Cigs + E-Cigs   | Non-Current     | 10.9 (0.4, 270.7) |          |
| Race/Ethnicity | NH Other v. NH White | Cigs + E-Cigs   | Cigs            | 1.1 (0.6, 2)      |          |
| Race/Ethnicity | NH Other v. NH White | Cigs + E-Cigs   | E-Cigs          | 0.9 (0.4, 2.1)    |          |
| Race/Ethnicity | NH Other v. NH White | Cigs + E-Cigs   | Polyuse + Cigs  | 1.8 (0.8, 3.8)    |          |
| Race/Ethnicity | NH Other v. NH White | Cigs + OC       | Non-Current     | 0.2 (0, 72.2)     |          |
| Race/Ethnicity | NH Other v. NH White | Cigs + OC       | Cigs            | 1 (0.7, 1.5)      |          |
| Race/Ethnicity | NH Other v. NH White | Cigs + OC       | OC              | 1.9 (0.4, 9.3)    |          |
| Race/Ethnicity | NH Other v. NH White | Cigs + OC       | Polyuse + Cigs  | 0.6 (0.3, 1.1)    |          |
| Race/Ethnicity | NH Other v. NH White | Cigs + SLT      | Non-Current     | 3.9 (0, 7718.3)   |          |
| Race/Ethnicity | NH Other v. NH White | Cigs + SLT      | Cigs            | 1.8 (0.6, 5.8)    |          |
| Race/Ethnicity | NH Other v. NH White | Cigs + SLT      | SLT             | 0.5 (0.1, 2.1)    |          |
| Race/Ethnicity | NH Other v. NH White | Cigs + SLT      | Polyuse + Cigs  | 0.5 (0.1, 3.6)    |          |
| Race/Ethnicity | NH Other v. NH White | Polyuse + Cigs  | Non-Current     | 0.2 (0, 209.8)    |          |
| Race/Ethnicity | NH Other v. NH White | Polyuse + Cigs  | Cigs            | 0.1 (0, 50.7)     |          |
| Race/Ethnicity | NH Other v. NH White | Polyuse + Cigs  | Cigs + E-Cigs   | 0.9 (0.4, 1.9)    |          |
| Race/Ethnicity | NH Other v. NH White | Polyuse + Cigs  | Cigs + OC       | 1.1 (0.6, 1.8)    |          |
| Race/Ethnicity | NH Other v. NH White | Polyuse + Cigs  | Cigs + SLT      | 1.1 (0.3, 3.9)    |          |
| Race/Ethnicity | NH Other v. NH White | Polyuse + Cigs  | Polyuse no Cigs | 0.3 (0, 2.2)      |          |
| Race/Ethnicity | NH Other v. NH White | Polyuse no Cigs | Non-Current     | 0.1 (0, 74.5)     |          |
| Race/Ethnicity | NH Other v. NH White | Polyuse no Cigs | E-Cigs          | 0.9 (0.4, 2.3)    |          |
| Race/Ethnicity | NH Other v. NH White | Polyuse no Cigs | OC              | 2.3 (1.2, 4.4)    | p < 0.05 |
| Race/Ethnicity | NH Other v. NH White | Polyuse no Cigs | SLT             | 0.3 (0.1, 1.1)    |          |
| Race/Ethnicity | NH Other v. NH White | Polyuse no Cigs | Polyuse + Cigs  | 0.4 (0.1, 1.8)    |          |
| Income         | <\$25k v. >\$50k     | Never           | Non-Current     | 1.8 (1.3, 2.4)    | p < 0.05 |
| Income         | <\$25k v. >\$50k     | Never           | Cigs            | 4.9 (1.9, 12.5)   | p < 0.05 |
| Income         | <\$25k v. >\$50k     | Never           | E-Cigs          | 1.6 (0.4, 6.2)    |          |
| Income         | <\$25k v. >\$50k     | Never           | OC              | 2.8 (1.1, 6.8)    | p < 0.05 |
| Income         | <\$25k v. >\$50k     | Never           | SLT             | 4.2 (0.1, 206.9)  |          |
| Income         | <\$25k v. >\$50k     | Non-Current     | Cigs            | 3.1 (2.5, 3.9)    | p < 0.05 |
| Income         | <\$25k v. >\$50k     | Non-Current     | E-Cigs          | 2.2 (1.4, 3.5)    | p < 0.05 |
| Income         | <\$25k v. >\$50k     | Non-Current     | OC              | 1.9 (1.5, 2.3)    | p < 0.05 |
| Income         | <\$25k v. >\$50k     | Non-Current     | SLT             | 0.8 (0.4, 1.3)    |          |
| Income         | <\$25k v. >\$50k     | Cigs            | Non-Current     | 0.6 (0.5, 0.8)    | p < 0.05 |
| Income         | <\$25k v. >\$50k     | Cigs            | Cigs + E-Cigs   | 0.9 (0.7, 1.1)    |          |
| Income         | <\$25k v. >\$50k     | Cigs            | Cigs + OC       | 1.7 (1.3, 2.3)    | p < 0.05 |
| Income         | <\$25k v. >\$50k     | Cigs            | Cigs + SLT      | 1.3 (0.7, 2.6)    |          |

|        |                          |                 |                 |                  |          |
|--------|--------------------------|-----------------|-----------------|------------------|----------|
| Income | <\$25k v. >\$50k         | E-Cigs          | Non-Current     | 1.5 (1, 2.1)     | p < 0.05 |
| Income | <\$25k v. >\$50k         | E-Cigs          | Cigs + E-Cigs   | 1.2 (0.8, 1.7)   |          |
| Income | <\$25k v. >\$50k         | E-Cigs          | Polyuse no Cigs | 2 (0.9, 4.1)     |          |
| Income | <\$25k v. >\$50k         | OC              | Non-Current     | 1.4 (1.2, 1.7)   | p < 0.05 |
| Income | <\$25k v. >\$50k         | OC              | Cigs + OC       | 3.6 (2.5, 5.1)   | p < 0.05 |
| Income | <\$25k v. >\$50k         | OC              | Polyuse no Cigs | 3.8 (2.7, 5.3)   | p < 0.05 |
| Income | <\$25k v. >\$50k         | SLT             | Non-Current     | 1.1 (0.7, 1.8)   |          |
| Income | <\$25k v. >\$50k         | SLT             | Cigs + SLT      | 1.3 (0.4, 4.2)   |          |
| Income | <\$25k v. >\$50k         | SLT             | Polyuse no Cigs | 1.4 (0.7, 2.6)   |          |
| Income | <\$25k v. >\$50k         | Cigs + E-Cigs   | Non-Current     | 1 (0, 137.8)     |          |
| Income | <\$25k v. >\$50k         | Cigs + E-Cigs   | Cigs            | 1 (0.9, 1.3)     |          |
| Income | <\$25k v. >\$50k         | Cigs + E-Cigs   | E-Cigs          | 0.6 (0.5, 0.9)   | p < 0.05 |
| Income | <\$25k v. >\$50k         | Cigs + E-Cigs   | Polyuse + Cigs  | 1.5 (0.8, 2.6)   |          |
| Income | <\$25k v. >\$50k         | Cigs + OC       | Non-Current     | 0.6 (0.2, 1.6)   |          |
| Income | <\$25k v. >\$50k         | Cigs + OC       | Cigs            | 1 (0.8, 1.2)     |          |
| Income | <\$25k v. >\$50k         | Cigs + OC       | OC              | 0.6 (0.3, 0.9)   | p < 0.05 |
| Income | <\$25k v. >\$50k         | Cigs + OC       | Polyuse + Cigs  | 1.4 (0.9, 2.2)   |          |
| Income | <\$25k v. >\$50k         | Cigs + SLT      | Non-Current     | 2.2 (0, 184.5)   |          |
| Income | <\$25k v. >\$50k         | Cigs + SLT      | Cigs            | 1.7 (0.9, 3.1)   |          |
| Income | <\$25k v. >\$50k         | Cigs + SLT      | SLT             | 0.6 (0.2, 1.5)   |          |
| Income | <\$25k v. >\$50k         | Cigs + SLT      | Polyuse + Cigs  | 1.5 (0.8, 3.1)   |          |
| Income | <\$25k v. >\$50k         | Polyuse + Cigs  | Non-Current     | 0.6 (0.1, 6.1)   |          |
| Income | <\$25k v. >\$50k         | Polyuse + Cigs  | Cigs            | 3.2 (0, 354.7)   |          |
| Income | <\$25k v. >\$50k         | Polyuse + Cigs  | Cigs + E-Cigs   | 0.9 (0.6, 1.3)   |          |
| Income | <\$25k v. >\$50k         | Polyuse + Cigs  | Cigs + OC       | 1.3 (0.9, 2)     |          |
| Income | <\$25k v. >\$50k         | Polyuse + Cigs  | Cigs + SLT      | 0.8 (0.4, 1.4)   |          |
| Income | <\$25k v. >\$50k         | Polyuse + Cigs  | Polyuse no Cigs | 0.4 (0.2, 0.9)   | p < 0.05 |
| Income | <\$25k v. >\$50k         | Polyuse no Cigs | Non-Current     | 3.6 (0.1, 129.8) |          |
| Income | <\$25k v. >\$50k         | Polyuse no Cigs | E-Cigs          | 1.5 (1, 2.4)     |          |
| Income | <\$25k v. >\$50k         | Polyuse no Cigs | OC              | 1.9 (1.3, 2.8)   | p < 0.05 |
| Income | <\$25k v. >\$50k         | Polyuse no Cigs | SLT             | 0.5 (0.3, 0.8)   | p < 0.05 |
| Income | <\$25k v. >\$50k         | Polyuse no Cigs | Polyuse + Cigs  | 2.2 (1.2, 3.9)   | p < 0.05 |
| Income | \$25k to \$50k v. >\$50k | Never           | Non-Current     | 1.4 (1, 2)       |          |
| Income | \$25k to \$50k v. >\$50k | Never           | Cigs            | 2.8 (1.1, 7.4)   | p < 0.05 |
| Income | \$25k to \$50k v. >\$50k | Never           | E-Cigs          | 0.6 (0, 9.3)     |          |
| Income | \$25k to \$50k v. >\$50k | Never           | OC              | 1.3 (0.5, 3.6)   |          |
| Income | \$25k to \$50k v. >\$50k | Never           | SLT             | 3.8 (0.1, 239.4) |          |
| Income | \$25k to \$50k v. >\$50k | Non-Current     | Cigs            | 1.8 (1.3, 2.4)   | p < 0.05 |
| Income | \$25k to \$50k v. >\$50k | Non-Current     | E-Cigs          | 1.9 (1.1, 3.2)   | p < 0.05 |
| Income | \$25k to \$50k v. >\$50k | Non-Current     | OC              | 1.2 (0.9, 1.6)   |          |
| Income | \$25k to \$50k v. >\$50k | Non-Current     | SLT             | 1.1 (0.6, 2.2)   |          |
| Income | \$25k to \$50k v. >\$50k | Cigs            | Non-Current     | 0.7 (0.6, 1)     | p < 0.05 |

|           |                          |                 |                 |                      |          |
|-----------|--------------------------|-----------------|-----------------|----------------------|----------|
| Income    | \$25k to \$50k v. >\$50k | Cigs            | Cigs + E-Cigs   | 1.3 (1, 1.6)         |          |
| Income    | \$25k to \$50k v. >\$50k | Cigs            | Cigs + OC       | 1.4 (1, 1.9)         | p < 0.05 |
| Income    | \$25k to \$50k v. >\$50k | Cigs            | Cigs + SLT      | 1.2 (0.5, 2.9)       |          |
| Income    | \$25k to \$50k v. >\$50k | E-Cigs          | Non-Current     | 1.7 (1.1, 2.6)       | p < 0.05 |
| Income    | \$25k to \$50k v. >\$50k | E-Cigs          | Cigs + E-Cigs   | 1.2 (0.7, 2)         |          |
| Income    | \$25k to \$50k v. >\$50k | E-Cigs          | Polyuse no Cigs | 0.7 (0.3, 1.7)       |          |
| Income    | \$25k to \$50k v. >\$50k | OC              | Non-Current     | 1.2 (0.9, 1.5)       |          |
| Income    | \$25k to \$50k v. >\$50k | OC              | Cigs + OC       | 2.6 (1.7, 3.9)       | p < 0.05 |
| Income    | \$25k to \$50k v. >\$50k | OC              | Polyuse no Cigs | 1.9 (1.2, 3)         | p < 0.05 |
| Income    | \$25k to \$50k v. >\$50k | SLT             | Non-Current     | 0.7 (0.5, 1.2)       |          |
| Income    | \$25k to \$50k v. >\$50k | SLT             | Cigs + SLT      | 1.9 (0.6, 6)         |          |
| Income    | \$25k to \$50k v. >\$50k | SLT             | Polyuse no Cigs | 0.7 (0.4, 1.3)       |          |
| Income    | \$25k to \$50k v. >\$50k | Cigs + E-Cigs   | Non-Current     | 0.9 (0, 507.5)       |          |
| Income    | \$25k to \$50k v. >\$50k | Cigs + E-Cigs   | Cigs            | 1.3 (1, 1.7)         | p < 0.05 |
| Income    | \$25k to \$50k v. >\$50k | Cigs + E-Cigs   | E-Cigs          | 0.9 (0.6, 1.3)       |          |
| Income    | \$25k to \$50k v. >\$50k | Cigs + E-Cigs   | Polyuse + Cigs  | 1.2 (0.6, 2.3)       |          |
| Income    | \$25k to \$50k v. >\$50k | Cigs + OC       | Non-Current     | 0.3 (0.1, 1.9)       |          |
| Income    | \$25k to \$50k v. >\$50k | Cigs + OC       | Cigs            | 1 (0.8, 1.4)         |          |
| Income    | \$25k to \$50k v. >\$50k | Cigs + OC       | OC              | 0.6 (0.3, 1.3)       |          |
| Income    | \$25k to \$50k v. >\$50k | Cigs + OC       | Polyuse + Cigs  | 1.1 (0.6, 1.9)       |          |
| Income    | \$25k to \$50k v. >\$50k | Cigs + SLT      | Non-Current     | 0 (0, 12.9)          |          |
| Income    | \$25k to \$50k v. >\$50k | Cigs + SLT      | Cigs            | 1.5 (0.8, 2.7)       |          |
| Income    | \$25k to \$50k v. >\$50k | Cigs + SLT      | SLT             | 1.3 (0.5, 3.8)       |          |
| Income    | \$25k to \$50k v. >\$50k | Cigs + SLT      | Polyuse + Cigs  | 1 (0.4, 2.2)         |          |
| Income    | \$25k to \$50k v. >\$50k | Polyuse + Cigs  | Non-Current     | 0.3 (0, 218.2)       |          |
| Income    | \$25k to \$50k v. >\$50k | Polyuse + Cigs  | Cigs            | 0.1 (0, 149.3)       |          |
| Income    | \$25k to \$50k v. >\$50k | Polyuse + Cigs  | Cigs + E-Cigs   | 1.3 (0.8, 2.1)       |          |
| Income    | \$25k to \$50k v. >\$50k | Polyuse + Cigs  | Cigs + OC       | 1.1 (0.6, 1.8)       |          |
| Income    | \$25k to \$50k v. >\$50k | Polyuse + Cigs  | Cigs + SLT      | 1.1 (0.7, 1.8)       |          |
| Income    | \$25k to \$50k v. >\$50k | Polyuse + Cigs  | Polyuse no Cigs | 0.4 (0.2, 1.2)       |          |
| Income    | \$25k to \$50k v. >\$50k | Polyuse no Cigs | Non-Current     | 6.7 (0.2, 199.2)     |          |
| Income    | \$25k to \$50k v. >\$50k | Polyuse no Cigs | E-Cigs          | 1.3 (0.7, 2.5)       |          |
| Income    | \$25k to \$50k v. >\$50k | Polyuse no Cigs | OC              | 1 (0.5, 2)           |          |
| Income    | \$25k to \$50k v. >\$50k | Polyuse no Cigs | SLT             | 0.4 (0.2, 0.8)       | p < 0.05 |
| Income    | \$25k to \$50k v. >\$50k | Polyuse no Cigs | Polyuse + Cigs  | 1.1 (0.5, 2.4)       |          |
| Education | <HS v. College+          | Never           | Non-Current     | 1.5 (0.8, 2.8)       |          |
| Education | <HS v. College+          | Never           | Cigs            | 8.9 (2.2, 36.3)      | p < 0.05 |
| Education | <HS v. College+          | Never           | E-Cigs          | 1283 (82.7, 19898.3) | p < 0.05 |
| Education | <HS v. College+          | Never           | OC              | 3.1 (0.7, 13.3)      |          |
| Education | <HS v. College+          | Never           | SLT             | 0 (0, 0)             | p < 0.05 |
| Education | <HS v. College+          | Non-Current     | Cigs            | 2.3 (1.5, 3.6)       | p < 0.05 |
| Education | <HS v. College+          | Non-Current     | E-Cigs          | 2.8 (1.4, 5.8)       | p < 0.05 |

|           |                    |                 |                 |                       |          |
|-----------|--------------------|-----------------|-----------------|-----------------------|----------|
| Education | <HS v. College+    | Non-Current     | OC              | 1.1 (0.7, 1.7)        |          |
| Education | <HS v. College+    | Non-Current     | SLT             | 1.7 (0.7, 4)          |          |
| Education | <HS v. College+    | Cigs            | Non-Current     | 0.4 (0.3, 0.5)        | p < 0.05 |
| Education | <HS v. College+    | Cigs            | Cigs + E-Cigs   | 0.9 (0.6, 1.2)        |          |
| Education | <HS v. College+    | Cigs            | Cigs + OC       | 0.9 (0.6, 1.4)        |          |
| Education | <HS v. College+    | Cigs            | Cigs + SLT      | 2.1 (0.5, 9.2)        |          |
| Education | <HS v. College+    | E-Cigs          | Non-Current     | 0.8 (0.5, 1.4)        |          |
| Education | <HS v. College+    | E-Cigs          | Cigs + E-Cigs   | 1 (0.6, 1.7)          |          |
| Education | <HS v. College+    | E-Cigs          | Polyuse no Cigs | 367.5 (37.9, 3559.9)  | p < 0.05 |
| Education | <HS v. College+    | OC              | Non-Current     | 1.4 (1.1, 1.8)        | p < 0.05 |
| Education | <HS v. College+    | OC              | Cigs + OC       | 5.3 (2.6, 11)         | p < 0.05 |
| Education | <HS v. College+    | OC              | Polyuse no Cigs | 3.3 (1.7, 6.2)        | p < 0.05 |
| Education | <HS v. College+    | SLT             | Non-Current     | 0.4 (0.3, 0.7)        | p < 0.05 |
| Education | <HS v. College+    | SLT             | Cigs + SLT      | 2.7 (0.1, 65)         |          |
| Education | <HS v. College+    | SLT             | Polyuse no Cigs | 0.6 (0.2, 1.5)        |          |
| Education | <HS v. College+    | Cigs + E-Cigs   | Non-Current     | 0 (0, 0.5)            | p < 0.05 |
| Education | <HS v. College+    | Cigs + E-Cigs   | Cigs            | 1.3 (0.9, 1.8)        |          |
| Education | <HS v. College+    | Cigs + E-Cigs   | E-Cigs          | 0.6 (0.3, 1.1)        |          |
| Education | <HS v. College+    | Cigs + E-Cigs   | Polyuse + Cigs  | 1.2 (0.5, 2.8)        |          |
| Education | <HS v. College+    | Cigs + OC       | Non-Current     | 0.3 (0, 389.5)        |          |
| Education | <HS v. College+    | Cigs + OC       | Cigs            | 1.2 (0.8, 1.8)        |          |
| Education | <HS v. College+    | Cigs + OC       | OC              | 0.4 (0.2, 0.8)        | p < 0.05 |
| Education | <HS v. College+    | Cigs + OC       | Polyuse + Cigs  | 1.4 (0.6, 2.9)        |          |
| Education | <HS v. College+    | Cigs + SLT      | Non-Current     | 0 (0, 2.7)            |          |
| Education | <HS v. College+    | Cigs + SLT      | Cigs            | 2.2 (0.5, 9.7)        |          |
| Education | <HS v. College+    | Cigs + SLT      | SLT             | 0.5 (0.1, 2.4)        |          |
| Education | <HS v. College+    | Cigs + SLT      | Polyuse + Cigs  | 0.5 (0.1, 2.4)        |          |
| Education | <HS v. College+    | Polyuse + Cigs  | Non-Current     | 0.2 (0, 69.4)         |          |
| Education | <HS v. College+    | Polyuse + Cigs  | Cigs            | 1.3 (0, 2345.8)       |          |
| Education | <HS v. College+    | Polyuse + Cigs  | Cigs + E-Cigs   | 0.6 (0.3, 1.2)        |          |
| Education | <HS v. College+    | Polyuse + Cigs  | Cigs + OC       | 0.9 (0.4, 1.8)        |          |
| Education | <HS v. College+    | Polyuse + Cigs  | Cigs + SLT      | 1.3 (0.4, 4.6)        |          |
| Education | <HS v. College+    | Polyuse + Cigs  | Polyuse no Cigs | 0.8 (0.2, 3.6)        |          |
| Education | <HS v. College+    | Polyuse no Cigs | Non-Current     | 2.1 (0.1, 57.7)       |          |
| Education | <HS v. College+    | Polyuse no Cigs | E-Cigs          | 1.8 (0.6, 5.3)        |          |
| Education | <HS v. College+    | Polyuse no Cigs | OC              | 0.7 (0.3, 1.6)        |          |
| Education | <HS v. College+    | Polyuse no Cigs | SLT             | 1.3 (0.6, 2.7)        |          |
| Education | <HS v. College+    | Polyuse no Cigs | Polyuse + Cigs  | 2.7 (0.5, 13.4)       |          |
| Education | HS/GED v. College+ | Never           | Non-Current     | 1.9 (1, 3.4)          | p < 0.05 |
| Education | HS/GED v. College+ | Never           | Cigs            | 15.1 (4.4, 52.1)      | p < 0.05 |
| Education | HS/GED v. College+ | Never           | E-Cigs          | 334.2 (10.3, 10879.6) | p < 0.05 |
| Education | HS/GED v. College+ | Never           | OC              | 1.3 (0.1, 11.5)       |          |

|           |                          |                 |                 |                    |          |
|-----------|--------------------------|-----------------|-----------------|--------------------|----------|
| Education | HS/GED v. College+       | Never           | SLT             | 1.4 (0.1, 24.6)    |          |
| Education | HS/GED v. College+       | Non-Current     | Cigs            | 4.2 (2.7, 6.4)     | p < 0.05 |
| Education | HS/GED v. College+       | Non-Current     | E-Cigs          | 4.2 (1.8, 10.1)    | p < 0.05 |
| Education | HS/GED v. College+       | Non-Current     | OC              | 0.8 (0.4, 1.9)     |          |
| Education | HS/GED v. College+       | Non-Current     | SLT             | 2.7 (0.7, 10.4)    |          |
| Education | HS/GED v. College+       | Cigs            | Non-Current     | 0.4 (0.3, 0.5)     | p < 0.05 |
| Education | HS/GED v. College+       | Cigs            | Cigs + E-Cigs   | 0.7 (0.5, 1.1)     |          |
| Education | HS/GED v. College+       | Cigs            | Cigs + OC       | 1.1 (0.7, 1.6)     |          |
| Education | HS/GED v. College+       | Cigs            | Cigs + SLT      | 1.9 (0.4, 9.5)     |          |
| Education | HS/GED v. College+       | E-Cigs          | Non-Current     | 0.8 (0.4, 1.5)     |          |
| Education | HS/GED v. College+       | E-Cigs          | Cigs + E-Cigs   | 1.1 (0.5, 2.4)     |          |
| Education | HS/GED v. College+       | E-Cigs          | Polyuse no Cigs | 678 (67.4, 6824.4) | p < 0.05 |
| Education | HS/GED v. College+       | OC              | Non-Current     | 1.3 (0.6, 2.6)     |          |
| Education | HS/GED v. College+       | OC              | Cigs + OC       | 6.7 (2.9, 15.6)    | p < 0.05 |
| Education | HS/GED v. College+       | OC              | Polyuse no Cigs | 4.4 (1.7, 11.2)    | p < 0.05 |
| Education | HS/GED v. College+       | SLT             | Non-Current     | 0.7 (0.2, 1.9)     |          |
| Education | HS/GED v. College+       | SLT             | Cigs + SLT      | 0.6 (0, 22.8)      |          |
| Education | HS/GED v. College+       | SLT             | Polyuse no Cigs | 0.4 (0.1, 2.4)     |          |
| Education | HS/GED v. College+       | Cigs + E-Cigs   | Non-Current     | 0.7 (0, 3512.6)    |          |
| Education | HS/GED v. College+       | Cigs + E-Cigs   | Cigs            | 1.4 (1, 2)         | p < 0.05 |
| Education | HS/GED v. College+       | Cigs + E-Cigs   | E-Cigs          | 0.6 (0.3, 1.3)     |          |
| Education | HS/GED v. College+       | Cigs + E-Cigs   | Polyuse + Cigs  | 0.9 (0.3, 3)       |          |
| Education | HS/GED v. College+       | Cigs + OC       | Non-Current     | 0.3 (0, 36.8)      |          |
| Education | HS/GED v. College+       | Cigs + OC       | Cigs            | 1.2 (0.8, 1.8)     |          |
| Education | HS/GED v. College+       | Cigs + OC       | OC              | 0.5 (0.2, 1.5)     |          |
| Education | HS/GED v. College+       | Cigs + OC       | Polyuse + Cigs  | 1.4 (0.7, 3.1)     |          |
| Education | HS/GED v. College+       | Cigs + SLT      | Non-Current     | 0 (0, 0.1)         | p < 0.05 |
| Education | HS/GED v. College+       | Cigs + SLT      | Cigs            | 2.5 (0.5, 13.2)    |          |
| Education | HS/GED v. College+       | Cigs + SLT      | SLT             | 0.4 (0.1, 2.8)     |          |
| Education | HS/GED v. College+       | Cigs + SLT      | Polyuse + Cigs  | 1.5 (0.3, 7.1)     |          |
| Education | HS/GED v. College+       | Polyuse + Cigs  | Non-Current     | 0 (0, 11)          |          |
| Education | HS/GED v. College+       | Polyuse + Cigs  | Cigs            | 3.3 (0, 2605.6)    |          |
| Education | HS/GED v. College+       | Polyuse + Cigs  | Cigs + E-Cigs   | 0.4 (0.2, 0.9)     | p < 0.05 |
| Education | HS/GED v. College+       | Polyuse + Cigs  | Cigs + OC       | 1.1 (0.6, 2.3)     |          |
| Education | HS/GED v. College+       | Polyuse + Cigs  | Cigs + SLT      | 1.4 (0.4, 5.5)     |          |
| Education | HS/GED v. College+       | Polyuse + Cigs  | Polyuse no Cigs | 0.5 (0.1, 3.4)     |          |
| Education | HS/GED v. College+       | Polyuse no Cigs | Non-Current     | 1 (0, 651.6)       |          |
| Education | HS/GED v. College+       | Polyuse no Cigs | E-Cigs          | 2.5 (0.6, 11.6)    |          |
| Education | HS/GED v. College+       | Polyuse no Cigs | OC              | 1.6 (0.4, 6.8)     |          |
| Education | HS/GED v. College+       | Polyuse no Cigs | SLT             | 1 (0.3, 4.2)       |          |
| Education | HS/GED v. College+       | Polyuse no Cigs | Polyuse + Cigs  | 12 (2.6, 55.1)     | p < 0.05 |
| Education | Some College v. College+ | Never           | Non-Current     | 1.6 (0.9, 2.9)     |          |



|           |                          |                 |                 |                    |          |
|-----------|--------------------------|-----------------|-----------------|--------------------|----------|
| Education | Some College v. College+ | Never           | Cigs            | 3.2 (0.7, 13.4)    |          |
| Education | Some College v. College+ | Never           | E-Cigs          | 0 (0, 0)           | p < 0.05 |
| Education | Some College v. College+ | Never           | OC              | 0.7 (0.1, 4.7)     |          |
| Education | Some College v. College+ | Never           | SLT             | 1.4 (0.1, 18.8)    |          |
| Education | Some College v. College+ | Non-Current     | Cigs            | 1.6 (1.1, 2.3)     | p < 0.05 |
| Education | Some College v. College+ | Non-Current     | E-Cigs          | 4.5 (2.4, 8.2)     | p < 0.05 |
| Education | Some College v. College+ | Non-Current     | OC              | 1 (0.7, 1.4)       |          |
| Education | Some College v. College+ | Non-Current     | SLT             | 1.8 (0.9, 3.6)     |          |
| Education | Some College v. College+ | Cigs            | Non-Current     | 0.5 (0.4, 0.6)     | p < 0.05 |
| Education | Some College v. College+ | Cigs            | Cigs + E-Cigs   | 1.3 (0.9, 1.8)     |          |
| Education | Some College v. College+ | Cigs            | Cigs + OC       | 0.8 (0.5, 1.3)     |          |
| Education | Some College v. College+ | Cigs            | Cigs + SLT      | 1.4 (0.3, 7.4)     |          |
| Education | Some College v. College+ | E-Cigs          | Non-Current     | 0.9 (0.5, 1.4)     |          |
| Education | Some College v. College+ | E-Cigs          | Cigs + E-Cigs   | 1.3 (0.8, 2.2)     |          |
| Education | Some College v. College+ | E-Cigs          | Polyuse no Cigs | 380.7 (37.8, 3834) | p < 0.05 |
| Education | Some College v. College+ | OC              | Non-Current     | 0.9 (0.7, 1.1)     |          |
| Education | Some College v. College+ | OC              | Cigs + OC       | 3 (1.5, 6.2)       | p < 0.05 |
| Education | Some College v. College+ | OC              | Polyuse no Cigs | 2.3 (1.2, 4.6)     | p < 0.05 |
| Education | Some College v. College+ | SLT             | Non-Current     | 0.6 (0.3, 1.2)     |          |
| Education | Some College v. College+ | SLT             | Cigs + SLT      | 3.2 (0.2, 62.9)    |          |
| Education | Some College v. College+ | SLT             | Polyuse no Cigs | 0.5 (0.2, 1.4)     |          |
| Education | Some College v. College+ | Cigs + E-Cigs   | Non-Current     | 2 (0, 174.6)       |          |
| Education | Some College v. College+ | Cigs + E-Cigs   | Cigs            | 1.2 (0.9, 1.7)     |          |
| Education | Some College v. College+ | Cigs + E-Cigs   | E-Cigs          | 0.9 (0.5, 1.7)     |          |
| Education | Some College v. College+ | Cigs + E-Cigs   | Polyuse + Cigs  | 0.9 (0.4, 1.9)     |          |
| Education | Some College v. College+ | Cigs + OC       | Non-Current     | 1.2 (0.1, 12.2)    |          |
| Education | Some College v. College+ | Cigs + OC       | Cigs            | 0.9 (0.6, 1.3)     |          |
| Education | Some College v. College+ | Cigs + OC       | OC              | 0.6 (0.3, 1.3)     |          |
| Education | Some College v. College+ | Cigs + OC       | Polyuse + Cigs  | 1.4 (0.7, 2.9)     |          |
| Education | Some College v. College+ | Cigs + SLT      | Non-Current     | 60.7 (2.6, 1401.1) | p < 0.05 |
| Education | Some College v. College+ | Cigs + SLT      | Cigs            | 2.1 (0.4, 10.6)    |          |
| Education | Some College v. College+ | Cigs + SLT      | SLT             | 0.5 (0.1, 2.2)     |          |
| Education | Some College v. College+ | Cigs + SLT      | Polyuse + Cigs  | 1.3 (0.2, 7.3)     |          |
| Education | Some College v. College+ | Polyuse + Cigs  | Non-Current     | 0.3 (0, 19.5)      |          |
| Education | Some College v. College+ | Polyuse + Cigs  | Cigs            | 4.2 (0, 611.4)     |          |
| Education | Some College v. College+ | Polyuse + Cigs  | Cigs + E-Cigs   | 0.6 (0.3, 1)       |          |
| Education | Some College v. College+ | Polyuse + Cigs  | Cigs + OC       | 0.8 (0.4, 1.6)     |          |
| Education | Some College v. College+ | Polyuse + Cigs  | Cigs + SLT      | 2 (0.6, 7)         |          |
| Education | Some College v. College+ | Polyuse + Cigs  | Polyuse no Cigs | 1 (0.2, 4.2)       |          |
| Education | Some College v. College+ | Polyuse no Cigs | Non-Current     | 1.5 (0.1, 42)      |          |
| Education | Some College v. College+ | Polyuse no Cigs | E-Cigs          | 1.6 (0.7, 3.6)     |          |
| Education | Some College v. College+ | Polyuse no Cigs | OC              | 0.8 (0.4, 1.4)     |          |

|           |                          |                 |                |                |  |
|-----------|--------------------------|-----------------|----------------|----------------|--|
| Education | Some College v. College+ | Polyuse no Cigs | SLT            | 0.8 (0.4, 1.8) |  |
| Education | Some College v. College+ | Polyuse no Cigs | Polyuse + Cigs | 2.2 (0.5, 9)   |  |
